# Inhibition of HIV-1 immune modulation by small molecules targeting viral Nef- host CD80 interface

*Anusmriti U. Sharma*<sup>1,3</sup>, *Shweta Sharma*<sup>4,5</sup>, *Gandhimathi Arumugam*<sup>2</sup>, *Archana Padmanabhan Nair*<sup>3</sup>, *Srinivas Ambala*<sup>4,5</sup>, *Gurunadham Munagala*<sup>4,5</sup>, *Kushalava Reddy Yempalla*<sup>4,5</sup>, *Akankshi Munja*<sup>2</sup>, *Shreenidhi Rajkumar*<sup>1</sup>, *Neelagandan Kamariah*<sup>1</sup>, *Ashok R. Venkitaraman*<sup>1,6</sup>, *Ramanathan Sowdhamini*<sup>2</sup>, *Taslimarif Saiyed*<sup>3</sup>, *Parvinder Pal Singh*<sup>4,5\*</sup>, *Ram A. Vishwakarma*<sup>3,5\*</sup>, *Satyajit Mayor*<sup>2\*#</sup> and *Anandi S. Karumbati*<sup>1,3\*</sup>

<sup>1</sup>Centre for Chemical biology and Therapeutics, Institute of Stem Cell Science and Regenerative Medicine, GKVK, Bellary Road, Bangalore, India

<sup>2</sup>National Centre for Biological Sciences, GKVK Campus, Bellary Road, Bangalore, India

<sup>3</sup>Centre for Cellular and Molecular Platforms, GKVK Campus, Bellary Road, Bangalore, India.

<sup>4</sup>CSIR-Indian Institute of Integrative Medicine, Canal Road, Jammu-180001, India.

<sup>5</sup>Academy of Scientific and Innovative Research (AcSIR), Ghaziabad-201 002, India.

<sup>6</sup>The Cancer Science Institute of Singapore, Centre for Translational Medicine, National University of Singapore, Singapore 117599 & Agency for Science, Technology and Research (A\*STAR), 8A Biomedical Grove, Singapore 138648.

\* Co-corresponding authors

# Further information and requests for resources and reagents should be directed to and will be fulfilled by the lead contact, Satyajit Mayor ([mayor@ncbs.res.in](mailto:mayor@ncbs.res.in))

## Abbreviations

Nef (Negative Regulatory Factor)

MHC (Major Histocompatibility Complex)

CD80/86 (Cluster of Differentiation 80 and 86)

APC (Antigen Presenting Cells)

AP (Aminopyrimidine)

PA (Phenoxyacetamide)

BC (Biaryl (heteroaryl) carbamate)

ART (antiretroviral therapy)

NNRTI (non-nucleoside inhibitors)

HAART (Highly Active Anti-Retroviral Therapy)

BnAb (Broadly neutralizing antibodies antibody)

LTNPs (Long-Term Non-Progressors)

MST (Micro-Scale Thermophoresis)

WST-1 (Water Soluble Tetrazolium-1)

SAXS (Small Angle X-ray scattering)

## **Keywords**

immune modulation

HIV-1

Co stimulatory receptors- CD80/86

T-cell activation

## Summary

HIV-1 causes diverse immunomodulatory responses in the host, including the down-regulation of co-stimulatory proteins CD80/86, mediated by HIV-1 protein Nef, blunting T-cell activation. Using a screening cascade of biochemical and cell-based assays, we identified potent small molecules representing three chemical scaffolds namely amino pyrimidine, phenoxy acetamide and bi-aryl heteroaryl carbamate which target the protein-protein interaction interface of CD80/86 and Nef with sub-micromolar potency. These molecules restore CD80/86 surface levels in HIV-1-Nef infected antigen presenting cells and T-cell activation. Nef-CD80 interface and small molecule binding sites were mapped by using computational docking and structural studies, followed by validation by mutational analysis. This analysis resulted in the identification of two key residues, K99 and R111, which were associated with down-modulation of CD80 surface levels by Nef and important for small molecule binding. Targeting these interacting residues disabled Nef-mediated down-modulation of CD80 surface levels, consequently restoring T-cell activation. Thus, we validate a new target, the Nef-CD80/86 protein-protein interaction interface, with a potential to develop new inhibitors to counteract the immunomodulatory consequences of HIV-1.

## Introduction

1 Over the past decade, there has been tremendous effort in finding newer therapies  
2 for HIV/AIDS. Increased use of anti-retroviral drugs has been accompanied by the  
3 steady increase in HIV drug resistance and viremia that often result in  
4 immunosuppression leading to morbidity<sup>3</sup>. Drug resistance is mainly transmitted at  
5 the time of infection or acquired during previous treatment for instance in women  
6 given anti-retroviral drugs to prevent mother-to-child transmission of HIV<sup>4</sup>. Other  
7 treatment strategies like using anti-HIV-1 antibodies (bnAbs) are reported in  
8 combination with ART which have the capacity to impact on HIV-1-specific T cell  
9 immune responses in infected humans but whether it controls the virus remains to be  
10 determined<sup>5</sup>. In addition, with the vaccine trials failing to elicit broad plasma  
11 neutralization of primary virus isolates<sup>6</sup>, there is an urgent need to fast-track the  
12 transition to newer antiviral drug regimens which needs to be administered in multi-  
13 drug combinations in order to combat the ever-evolving virus. Increasing drug  
14 resistance also emphasizes the requirement of new molecules that can target the  
15 host-viral interface with high specificity<sup>7,8</sup>.

16 To obtain targets for the next generation of HIV-1 therapy we explored the interaction  
17 interface of the essential HIV-1 accessory protein, Nef<sup>9</sup>, with host proteins. Nef is a  
18 27-35 kDa protein expressed during early phases of viral replication and helps  
19 maintain a constant state of infection by disrupting T-cell activation, thereby allowing  
20 evasion of the host immune system<sup>10,11,12</sup>. Evidence supporting a direct role for Nef  
21 in HIV disease comes from transgenic mouse models developed, in which a CD4-  
22 derived promoter was used to express Nef in various tissues including thymus,  
23 kidney and lungs which progressed into AIDS-like phenotype, featuring CD4+ T-cell  
24 loss, thymic involution, splenic atrophy and subsequent kidney and lung pathology<sup>13</sup>.

25 This phenotype in many aspects' mimics human AIDS. Also in patient populations,  
26 fortuitous deletions in the *nef* gene in HIV infected patients of the Sydney Blood  
27 Bank Cohort remain essentially free of AIDS related symptoms<sup>14,15</sup>. In another study,  
28 the proportion of *nef* gene defects was found to be significantly higher in Long-Term  
29 Non-Progressors (LTNPs) compared to progressors<sup>16,17,18</sup>. These animal and  
30 patient studies suggests that Nef plays a pivotal role in pathogenesis and AIDS-like  
31 progression in HIV-infected individuals<sup>19</sup>.

32 Nef functions by re-engineering the levels of many surface proteins such as MHC-I,  
33 CD4, CD28, CXCR4, and CD3 in infected cells, and redirecting them to  
34 endosomes<sup>20,21</sup>. Nef interacts either directly or indirectly with multiple host partners  
35 and functions to increase the pathogenesis of the virus<sup>22,23</sup>. Our previous work has  
36 highlighted interactions of Nef with the host cell surface co-stimulatory proteins CD80  
37 and CD86<sup>24,25</sup>. Down-regulation of CD80/86 is sufficient to cause impaired naïve T-  
38 cell stimulation *in vitro* and *in vivo*<sup>26</sup>. We have shown that by administering just the  
39 cytoplasmic tails of CD80 and CD86 in Nef-expressing cells, CD80/86 down  
40 modulation is prevented, making this host-viral interface amenable for developing  
41 new chemical biological tools and providing targets for therapeutic intervention.

42 The variety of functions carried out by Nef is based on its ability to interact with  
43 multiple cellular proteins. This is possibly due to its structure; it has many flexible  
44 regions, a feature unusual for cytoplasmic proteins. The unstructured regions of Nef  
45 may ease the allosteric adjustments required for interaction of Nef with different  
46 proteins. However, the flexible and unstructured features of Nef protein add  
47 substantial challenges to structurally characterize the full-length Nef protein and  
48 study their binding sites.

49 In the current study, we show that Nef directly binds to cytoplasmic tail peptides of  
50 CD80 and CD86. We have identified small molecules, which can abrogate Nef  
51 interactions with CD80 and/or CD86. The compounds mainly belong to 3 scaffolds  
52 amino pyrimidine (**AP**), phenoxy acetamide (**PA**) and bi-aryl heteroaryl carbamate  
53 (**BC**) having nanomolar to micromolar inhibition potencies *in vitro*. Representative  
54 actives from these scaffolds were then validated in functional cell-based assays for  
55 reverting the down regulation of cell surface Nef-mediated co-stimulatory protein  
56 expression and re-establishing T-cell activation. These identified actives also  
57 reversed similar Nef-mediated effects after viral infections.

58 To further improve the efficacy of these leads, we used an *in-silico* approach to  
59 explore the binding mode of Nef with the co-stimulatory molecules. Full length Nef  
60 protein was modeled and potential binding sites for CD80 were identified. Based on  
61 these predictions a selected subset of CD80 interacting residues in Nef were  
62 mutated and the corresponding mutants were examined in assay platforms to  
63 confirm the model and its functional consequences. The understanding of the  
64 druggable pocket opens the scope for future lead optimization work. Altogether, we  
65 report a chemical strategy to inhibit Nef-mediated immunomodulatory functions,  
66 which prevents immune evasion of HIV-infected cells. While these molecules may be  
67 developed for future therapeutic intervention, at the current stage, they may be used  
68 as chemical biology tools to understand the role of host-pathogen interface in the  
69 form of Nef-CD80/86 interaction surface in HIV immune evasion.

70

## 71 **Results**

### 72 **Identification of potent Inhibitors that disrupt Nef-CD80/CD86 Interaction**

73 In our previous work, we have shown that cytoplasmic tail peptides from CD80 and  
74 CD86 compete with the down modulation of surface CD80/86 by Nef protein in cell  
75 based assays<sup>25</sup>. For our assays we have used Nef F2 recombinant protein of  
76 Subtype-C origin (the alignment of the Nef sequence from this subtype with the  
77 commonly used subtype B is presented in **Sup. Fig. S1a**). To ascertain direct  
78 binding of Nef to the cytoplasmic tail peptide of the co-stimulatory receptors CD80 or  
79 CD86 in microscale thermophoresis (MST) assay<sup>27</sup>, we added 20-mer peptide of  
80 CD80 or CD86 (**Fig. 1a, Sup. Fig. S1b**) to fluorescently labelled Nef. A 16-point  
81 titration of peptides against Nef was carried out (see details in Star Methods). Nef-  
82 CD80 interaction showed a saturation curve with a  $K_D$  of 27  $\mu$ M (**Fig.1b**). Nef-CD86  
83 interaction showed a sigmoidal curve with 112 nM  $K_D$ , indicating a higher affinity  
84 interaction (**Fig.1c**). Having verified the direct binding of the CD80 and CD86  
85 peptides with Nef in MST, we immobilized CD80/86 cytosolic peptides in a microtiter  
86 plate and examined the binding of Nef in an ELISA assay (Scheme, **Sup. Fig. S1c**).  
87 There was a 4-fold increase in the fluorescent signal due to binding of Nef to the 20-  
88 mer CD80/86 cytosolic tail peptides compared to wells with an unrelated peptide  
89 (from CD74), or with no peptide controls (**Fig. 1d**). We used this ELISA format to  
90 screen and identify inhibitors of Nef-CD80 and Nef-CD86 interaction.  
91 Small molecules were hand-picked for screening based on their drug-likeness and  
92 prior knowledge of potential protein-protein disruptors<sup>7</sup>. A threshold value was set to  
93 select actives with  $CD80 \geq 30\%$  and  $CD86 \geq 20\%$  cut-off for the Normalized Percent  
94 Inhibition. Based on this criterion, 33 actives belonging to nine scaffolds were  
95 identified from the screen (**Fig.1e, f**). **Fig.1g** depicts flow diagram of step-wise  
96 filtering process. After eliminating singleton scaffolds; we identified hits that belonged  
97 primarily to three scaffolds namely amino pyrimidine (**AP**), phenoxy acetamide (**PA**)

98 and bi-aryl heteroaryl carbamate (**BC**), which comprised of 20 compounds (**Supp**  
99 **Table 1**), and these were selected for resynthesis (**Sup. Fig. S2**). Compounds from  
100 all three scaffolds showed half maximal Inhibitory Concentration (IC<sub>50</sub>) in nanomolar  
101 ranges (**Fig. 1h; Supp Table 1**). Two independent experimental dose response data  
102 correlated very well with an R<sup>2</sup> value of 0.9 (**Sup. Fig. S3**).

103 In summary, the biochemical screen identified more interaction inhibitors of Nef-  
104 CD80 than Nef-CD86, which correlates well the MST binding isotherms indicating  
105 that the Nef-CD86 interaction is of higher affinity than the Nef-CD80 interaction. One  
106 representative compound from each scaffold with high potency against Nef-CD80  
107 interaction was chosen for further cell-based assays.

108

### 109 **Small molecules block Nef-mediated internalization of cell surface CD80/CD86** 110 **receptors**

111 Before starting efficacy studies, we evaluated the cytotoxicity of the compounds  
112 (**AP5, PA4** and **BC5**), as measured by WST-1 (Water Soluble Tetrazolium-1) assay.  
113 The cytotoxicity index at the highest concentration of 100 µM for 24 h was around  
114 17% for **AP5** and **PA4** whereas **BC5** was around 20% (**Sup. Fig. S4**). The maximum  
115 concentration tested was 100 µM, and the concentrations chosen for the efficacy  
116 work were mostly non-toxic for the assay durations.

117 The cellular efficacy assay was developed based on observations from our previous  
118 work: the delivery of cytoplasmic CD80/86 tail peptides into the cell cytoplasm was  
119 able to compete with and abrogate Nef-mediated internalization of cell surface  
120 CD80/86<sup>25</sup>. We expected the small molecules identified by the biochemical screen  
121 to behave in similar fashion to the cytosolic peptides. Surface levels of CD80/86  
122 receptors in cells in culture with or without Nef protein were determined, and we



123 observed a significant loss of surface levels of CD80 and CD86 in the presence of  
124 Nef in at least 3 types of Antigen Presenting Cells (APCs), including monocytes (**Fig.**  
125 **2a**), consistent with our previous work<sup>25</sup>. The loss of CD80/86 surface receptors was  
126 not observed with delivery of other non-specific proteins such as ovalbumin and  $\beta$ -  
127 lactoglobulin which confirms that the internalization of surface receptors CD80 and  
128 CD86 was indeed due to Nef (**Sup. Fig. S5**). We used RAJI, a B-lymphocyte cell line  
129 for our experiments since this cell line has high levels of CD80 and CD86, and chose  
130 to focus on targeting on the Nef-CD80 interface.

131 To test the effect of the compounds on Nef-mediated CD80 down modulation, cells  
132 were pre-treated with the **AP5**, **PA4** and **BC5** at two concentrations 10 and 100  $\mu$ M  
133 for 1 hour. Purified Nef protein was delivered into the cells and surface CD80 levels  
134 were analyzed by flow cytometry. **AP5** inhibited Nef-mediated down modulation of  
135 CD80 at both 10  $\mu$ M (\* $p \leq 0.05$ ) and 100  $\mu$ M (\*\* $p \leq 0.01$ ) thereby restoring CD80  
136 levels. Compounds **PA4** and **BC5** also showed a significant restoration (\* $p \leq 0.05$ ) of  
137 surface CD80 levels only at 100  $\mu$ M (**Fig. 2b**).

138 We further validated the ability of these three compounds to reverse the effects of  
139 Nef in RAJI cells transduced with Nef-containing virus (YFP-tagged Nef) or Nef-  
140 deficient control virus (expressing only YFP). RAJI cells were pre-treated with **AP5**,  
141 **PA4** and **BC5** for 24 hours' prior-exposure to virus and further incubated with virus  
142 for 96h and then surface levels of CD80 receptors were estimated by flow cytometry,  
143 there was ~50% loss of CD80 surface receptors in cells transduced with Nef-  
144 containing virus as compared to control Nef-deficient virus infected cells. In cells  
145 pre-treated with compounds, all 3 compounds significantly reversed Nef-mediated  
146 internalization of CD80 receptors at 100  $\mu$ M (**Fig. 2c**).

147

148 **Compound AP5 is a selective inhibitor for Nef-induced CD80 down modulation**

149 Since Nef also downregulates other cell surface molecules such as MHC-I and  
150 MHC-II in APCs and CD4 in T-cells, apart from CD80/86 during viral infection, we  
151 determined the effect of these compounds on the levels of MHC-I<sup>28</sup> in Nef-  
152 transduced APCs. After compound treatment, we observed that **PA4** and **BC5**  
153 reversed Nef-mediated effect of MHC-I down modulation while **AP5** did not alter Nef-  
154 mediated down regulation of MHC-I even at 100  $\mu$ M concentration (**Fig. 2d**).

155 Together, these data suggested that while all compounds disrupted Nef interactions  
156 with CD80 and prevented the down modulation of CD86, the Nef-activated cascade  
157 that triggers MHC-I down modulation was reversed only by **PA4** and **BC5**. This  
158 indicates a very specific role for **AP5**, and a more broad-spectrum role for **PA4** and  
159 **BC5**.

160

161 **Restoration of T-cell activation in virus infected APCs by inhibitors**

162 The co-stimulatory receptors CD80/86 along with MHC-I are needed for T-cell  
163 activation. Previously it was shown that HIV-1 Nef-CD80/86 interaction impairs naïve  
164 T-cell activation in *in-vivo* and *in-vitro* mouse systems<sup>24</sup>. We therefore ascertained if  
165 the small molecule inhibitors were able to reverse Nef-mediated T-cell inactivation. A  
166 co-culture assay system was adapted from a previously reported cell-based assay  
167 for testing CD80 inhibitors<sup>29</sup> (**Fig. 3a**). Briefly, a non-replicative retroviral vector with  
168 Nef transgene (**Sup Fig. 6 shows** a comparison of the non-replicative retroviral  
169 vector with infectious HIV-1) was transduced in APCs to reduce CD80/86 levels at  
170 the surface . These APCs were then co-cultured with T-cells in the presence of anti-  
171 CD3 antibody and functional T-Cell activation was assessed by measuring IL-2

172 levels; relevant controls included T-cells alone, T-cells and B-cells in the absence of  
173 anti- CD3 antibody (**Fig. 3b**).

174 We tested two different modes of addition of compounds: in the first mode, we pre-  
175 treated APCs with 1, 10 and 100  $\mu\text{M}$  of compounds (**AP5**, **PA4** and **BC5**) for 24h  
176 then exposed the cells to Nef-carrying viral particles and assayed for IL-2 release.  
177 We observed a dose dependent response with all 3 compounds **AP5**, **PA4** and **BC5**  
178 showing a 4-fold increase (\*\* $p \leq 0.01$ ) in IL-2 release at 100  $\mu\text{M}$  as compared to Nef  
179 virus control. At lower concentrations, compounds **AP5** and **PA4** showed 2-fold  
180 increase (\* $p \leq 0.05$ ) at 10  $\mu\text{M}$ . **PA4** did not show significant IL-2 release at 10  $\mu\text{M}$   
181 (**Fig. 3c**), thus, indicating restoration of T-cell activation in a dose dependent  
182 manner.

183 In the second mode, we added compounds at 1, 10 and 100  $\mu\text{M}$  concentrations post  
184 viral exposure for 96h. **AP5** showed significant increase in IL-2 levels (3-fold) at all  
185 concentrations when compared to Nef virus control (\*\* $p \leq 0.01$ ), while **PA4** showed  
186 2-fold increase (\* $p \leq 0.05$ ) in IL-2 levels at 10  $\mu\text{M}$  concentration and no changes in IL-  
187 2 levels were observed in **BC5**. Interestingly, there was a reduction in IL-2 release at  
188 100  $\mu\text{M}$  dose in comparison to 1  $\mu\text{M}$  and 10  $\mu\text{M}$ , perhaps due to the toxicity  
189 associated with this dose alongside viral effects (**Fig. 3d**). Thus far, these data  
190 shows that **AP5** is a potent molecule both *in vitro* biochemical assays and in  
191 restoring T-cell activation in an assay designed to assess the role of co-stimulation  
192 dependent T-cell activation mediated by CD80/86.

193

### 194 **Structural insights into Nef-CD80 interaction**

195 To further understand the nature of inhibition of Nef-CD80 interaction by small  
196 molecules such as AP5, we chose to analyze the structure of Nef-CD80-interaction

197 pocket. This requires the characterization of the interaction surface between Nef-  
198 CD80 and an analysis of the ligand binding pocket for CD80. Despite repeated  
199 attempts we were unable to obtain crystals of full-length Nef that diffracted better  
200 than 4 Å, wherein the structure could be fully resolved. In the absence of a high-  
201 resolution X-ray structure of the full-length Nef, we created a computational model of  
202 Nef using a multi-template modeling approach. The major structural information was  
203 acquired from the NMR structure PDB ID: 2NEF, as this structure has information for  
204 the highly flexible loop region of the core domain (55-66) which contains important  
205 interacting residues<sup>30</sup>, as well as from the crystal structure PDB ID: 3RBB which  
206 contains structural information of C-terminal folded core (residues 79-206). After  
207 modeling, the lowest energy state structure was obtained by energy minimization via  
208 SYBYL (Version 7.1) (Tripos Associates Inc.) and validated using PROCHECK.  
209 PROCHECK results for the model shows more than 95% of the residues are in  
210 allowed regions (79.9% in the strictly allowed region and 17.2% in partially allowed  
211 region of the Ramachandran plot) which is better than the template structure (62.3%  
212 in the strictly allowed region and 34.2% in partially allowed region of the  
213 Ramachandran plot).

214 The structure of full-length Nef can be divided into two parts: a flexible and  
215 structurally diverse N-terminal region of about 70 residues followed by a well-  
216 conserved and folded core domain of about 120 amino acids. The core domain is the  
217 only part of the Nef protein which has a stable tertiary structure. It forms an  $\alpha$ - $\beta$   
218 domain in which a central anti-parallel  $\beta$ -sheet of four strands ( $\beta$ 1-  $\beta$ 4) is flanked by  
219 two long anti-parallel  $\alpha$  helices ( $\alpha$ 4 and  $\alpha$ 5) and two short  $\alpha$  helices ( $\alpha$ 1 and  $\alpha$ 5).  
220 Residues 60-71 and 149-180 form flexible solvent exposed loops<sup>19</sup> (**Fig 4a**).

221 An independent verification of some aspects of the model was obtained from the  
222 predicted Small Angle X-ray Scattering (SAXS) envelope of soluble Nef protein.  
223 SAXS-patterns of full-length Nef were obtained at three different concentrations 1, 3  
224 and 5 mg/ml (**Sup. Fig. S7a**). The Guinier plots at low angles appeared linear and  
225 confirmed good data quality with no indication of protein aggregation (**inset Sup.**  
226 **Fig. S7a**). The derived  $R_g$  values and the calculated maximum particle dimension  
227 ( $D_{max}$ ) values were reported. The  $R_g$  values extracted from the  $P(r)$  function are in  
228 agreement with the  $R_g$  values extracted from the Guinier region (**Sup. Table 2**). The  
229 estimated  $R_g$ ,  $D_{max}$  and molecular mass of the full-length Nef suggest a  
230 concentration dependent increase in the  $R_g$ ,  $D_{max}$  and molecular mass values  
231 observed with Nef addition. Visual inspection of the normalized Kratky plot reveals  
232 significant deviation from a bell-shaped profile which depict an inherent structural  
233 flexibility of Nef (**Sup. Fig. S7b**). The averaged solution shape calculated using the 1  
234 mg/ml scattering data clearly indicated that Nef is monomeric in solution. This  
235 solution model also revealed a two-domain architecture, a large domain that is well  
236 overlaid with the available 3D structure of folded C-terminal core (PDB ID: 3RBB)  
237 (**Sup. Fig. S7c**)<sup>31, 32</sup>. The small domain corresponds to the N-terminal region  
238 (residues 1-78) that contain a long flexible loop (residues 24-68). While structural  
239 details of N-terminal region are available from NMR studies of a peptide regions from  
240 residues 2-26<sup>33</sup> and 2-57<sup>30</sup>, information about the relative orientation with C-terminal  
241 core domain is missing. The SAXS data envelope along with the computational  
242 model (**Fig. 4b**) provides structural information about spatial arrangement of the C-  
243 terminal folded core and the flexible N-terminal region of full-length Nef in solution,  
244 consistent with the computational predictions.

245

## 246 **Identification of crucial residues involved in Nef-CD80 interaction surface**

247 We next utilized the computational prediction of full-length Nef structure and  
248 molecular docking studies with the cytoplasmic tail of CD80, to identify key residues  
249 at the interaction surface. The putative binding sites of cytoplasmic CD80 to full  
250 length Nef were mapped onto the template model utilizing SiteMap program for  
251 binding site prediction. In characterizing binding sites, SiteMap provided quantitative  
252 and graphical information in terms of site score and druggability score with properties  
253 such as hydrogen bond donor, acceptor, hydrophobic and hydrophilic regions in the  
254 predicted site. Docking studies of cytoplasmic tail region of CD80 with full length Nef  
255 revealed that CD80 may interact with the interface between the flexible N-terminal  
256 and C-terminal core domain. Potential binding sites were predicted with a good site  
257 and druggability score (>0.5; **Sup. Table 3**).

258 The sites of interacting regions of Nef with other cellular proteins have been  
259 previously characterized. A polyproline motif (68-78aa) present on the core domain  
260 of Nef binds to the SH3 domain of Src kinases with high (nM to  $\mu$ M) affinity<sup>34</sup>. Other  
261 than the polyproline motif within the core domain, a number of residues on the core  
262 domain are involved in multiple interactions, such as FPD<sub>126-128</sub> with human  
263 thioesterase and W<sub>61</sub> and L<sub>115</sub> with CD4<sup>19</sup>. An acidic cluster (EEEE<sub>65</sub>) close to the  
264 core domain is required for interaction with PACS1 and controls MHC-I down-  
265 regulation<sup>35,36</sup>. The unstructured regions of Nef also provide an extensive accessible  
266 surface that could be used to connect to other molecules. Since there is no prior  
267 information about the binding pattern of Nef with CD80 it was necessary to score  
268 each pose based on energy calculations. From the top ranked docked poses, the  
269 best complex with the lowest energy (-246.30 kcal/mol) was chosen as the model  
270 complex for Nef and CD80 interaction. In this predicted pose, CD80 cytoplasmic

271 region (indicated in cyan) interacts with the Site-1 and 2 residues in the core domain  
272 of Nef (indicated in blue) (**Fig. 4c**). Based on this pose, the interacting residues  
273 were mapped (**left inset Fig. 4c**). The side chains of site-1 residues W<sub>61</sub>, E<sub>68</sub>, K<sub>99</sub>  
274 and R<sub>111</sub> are in favourable position to interact with the N-terminus of the CD80  
275 cytoplasmic tail. It should be noted that the residues K<sub>99</sub> and R<sub>111</sub> potentially make  
276 polar contact with CD80 backbone carbonyl oxygen of F<sub>4</sub> and side chain hydroxyl  
277 group of Y<sub>2</sub>, respectively. In addition, the C-terminus of the CD80 cytoplasmic tail  
278 potentially interact with E<sub>160</sub> and D<sub>180</sub> residues. The side of E<sub>160</sub> potentially makes salt  
279 bridge interaction with R<sub>16</sub> and R<sub>23</sub> of CD80 (**right inset Fig. 4c,**). Based on our *in-*  
280 *silico* predictions we chose four residues that include, 3 from Site-1 (W<sub>61</sub>, K<sub>99</sub> and  
281 R<sub>111</sub>) and one from Site-2 (E<sub>160</sub>) for further analysis.

282

### 283 **Functional validation of predicted residues mediating Nef-CD80 interaction**

284 Single site mutant of Nef such as Nef<sup>fW61A</sup>, Nef<sup>fK99A</sup>, Nef<sup>fR111A</sup> and Nef<sup>fE160A</sup> were  
285 designed and purified (**Sup. Fig. 8a & b**). These mutants were tested for their affinity  
286 for CD80 peptide in the ELISA assay (**Fig. 5a**). Two mutants Nef<sup>fK99A</sup> and Nef<sup>fR111A</sup>  
287 showed a loss of affinity to the CD80 peptide, whereas, the Nef<sup>fW61A</sup> and Nef<sup>fE160A</sup>  
288 exhibited an affinity comparable to full length Nef<sup>WT</sup>. These mutants were also  
289 assessed for their ability to affect CD80 surface levels after delivery into APCs.  
290 Indeed, the two mutants Nef<sup>fK99A</sup> and Nef<sup>fR111A</sup> did not show any reduction in CD80  
291 levels, while Nef<sup>fW61A</sup> showed slightly lesser reduction in CD80 receptors and Nef<sup>fE160A</sup>  
292 behaved similar to Nef<sup>WT</sup> (**Fig. 5b**). Consistent with a key role for the K<sub>99</sub> and R<sub>111</sub> in  
293 Nef-CD80 interactions, when transduced into APCs, Nef<sup>fK99A</sup> and Nef<sup>fR111A</sup> mutants  
294 did not affect IL-2 release (**Fig. 5c**) thereby showing that T-cell activation is not  
295 compromised by these mutant Nef variants. Surprisingly, while Nef<sup>fW61A</sup> down

296 modulated CD80 significantly, it did not result in a loss of T-cell activation. Since T-  
297 cell activation assay requires a minimum of 4-5 h we reasoned that the Nef<sup>W61A</sup>  
298 protein delivered into the APCs may be less stable than the other isoforms for the 5  
299 h required for this assay. Indeed, western blot analysis of the protein at 2 h versus 5  
300 h in cell lysates shows that the level of Nef<sup>W61A</sup> protein was drastically decreased  
301 after 5 h, while the levels of the other Nef protein variants remained substantial (**Sup**  
302 **Fig. 8c**). The other Nef<sup>E160A</sup> mutant exhibited similar reduction of IL-2 release as  
303 Nef<sup>WT</sup> consistent with its ability to bind CD80 peptides as well as down modulate  
304 CD80 at the APC surface (**Fig. 5b-d**).

305 The two mutants Nef<sup>W61A</sup> and Nef<sup>R111A</sup> also did not down regulate MHC-I receptors  
306 as much as Nef<sup>WT</sup>; whereas Nef<sup>K99A</sup> and Nef<sup>E160A</sup> exhibited a similar reduction in  
307 MHC-I levels as Nef<sup>WT</sup>, as assessed by surface MHC-I antibody staining (**Fig. 5d**).

308 W<sub>61</sub> residue (W<sub>57</sub> in Subtype B) has been previously reported to be important in CD4  
309 down regulation and R<sub>111</sub> residue (R<sub>106</sub> in subtype B) is located in the oligomerization  
310 domain of Nef. Many residues of Nef have been identified that promote interaction  
311 with MHC-I, including W<sub>57</sub> and R<sub>106</sub> in subtype-B, NL4-3 strain, but their mutation did  
312 not hinder MHC-I down regulation<sup>37</sup>. However, W<sub>61</sub> and R<sub>111</sub> residues in subtype C,  
313 appear potentially important for Nef interaction with MHC-I, indicating subtle  
314 differences in the modulation of host proteins by different Nef variants. Nevertheless,  
315 these functional studies provide strong support to the predicted binding mode of  
316 CD80 peptide with Nef via residues K<sub>99</sub> and R<sub>111</sub> in Site 1 (**Fig. 4c**). Mutation in these  
317 residues leads to loss of binding capacity, resulting in the inability to down-modulate  
318 CD80 thereby restoring T-cell activation function of the transduced APCs.

319

320 **AP5 ligand binding sites in Nef full length**



321 Considering the predictive potential of the computational model of Nef-CD80  
322 interaction surface, the most potent binding inhibitor molecule, **AP5** was docked with  
323 Nef protein to capture its binding pattern and important residues involved in  
324 interaction. **AP5** fits nicely into the hydrophobic cavity formed by the residues W<sub>61</sub>,  
325 V<sub>71</sub>, L<sub>115</sub> and W<sub>118</sub>, which are part of the N-terminal loop region and the  $\alpha$ 4 helix of  
326 core domain (**Fig. 6a and inset**). The aromatic residues W<sub>61</sub> and W<sub>118</sub> mainly have  $\pi$   
327  $-\pi$  stacking interaction with aromatic ring B in **AP5**. In addition to hydrophobic  
328 interactions, the side chain of S<sub>50</sub> and backbone of E<sub>68</sub> form hydrogen bond  
329 interaction with amine group of the ligand. The side chain of K<sub>99</sub> from  $\alpha$ 3 helix of core  
330 domain, interacts with the CF<sub>3</sub> (trifluoro methyl) group. Moreover, AP5 binding site  
331 overlaps with Site-1 of Nef-CD80 binding pocket, and the docking results showed  
332 that the Nef-CD80 and Nef-AP5 binding sites are overlapping with two important  
333 common residues such as W<sub>61</sub> and K<sub>99</sub>.

334 Consistent with these predictions, at 10  $\mu$ M **AP5** was neither able to inhibit the  
335 interaction between CD80 peptide and Nef<sup>fW61A</sup> mutant nor further reduce the residual  
336 interaction of Nef<sup>fK99A</sup> and Nef<sup>fR111A</sup> mutants *in vitro* (**Fig. 6b**). However, AP5 was able  
337 to displace both Nef<sup>fWT</sup> and Nef<sup>fE160A</sup> from CD80 peptides adsorbed on the ELISA  
338 plate. Thus, W<sub>61</sub> is an important residue for **AP5** binding to Nef. Furthermore, in  
339 agreement with the predictions, **AP5** treatment did not result in any change in  
340 surface levels of CD80 in APCs transduced with Nef<sup>fW61A</sup>, Nef<sup>fK99A</sup> and Nef<sup>fR111A</sup>  
341 mutant proteins (**Fig. 6c**). The levels of IL-2 release in all three mutants Nef<sup>fW61A</sup>,  
342 Nef<sup>fK99A</sup> and Nef<sup>fR111A</sup> also remained unchanged, with the Nef<sup>fW61A</sup> mutant mimicking  
343 the inhibition observed with wild type Nef. **AP5** restored IL-2 release in Nef<sup>fE160A</sup>  
344 treated cells, comparable to Nef<sup>fWT</sup> (**Fig. 6d**), consistent with the inability of Nef<sup>fE160A</sup>  
345 to affect neither CD80 nor **AP5** binding, thereby serving as a negative control. These

346 results predict and functionally validate the residues in the Nef protein that are  
347 important for AP5 binding.

348

### 349 **Hit refinement of AP series**

350 We chose **AP5** as our starting point, given its nanomolar and micromolar potencies  
351 in biochemical and cell-based assays respectively as well as specificity to CD80. An  
352 initial hit refinement of **AP5** was conducted to understand the preliminary structure-  
353 activity relationships (SAR). New analogs were synthesized in two series by  
354 modifying the rings B and C with un/substituted aryl (heteroaryl) moieties, and  
355 without -CF<sub>3</sub> group at the 6<sup>th</sup> position (**Fig. 7a**). In series-1, four analogs AP(S1-S4)  
356 were prepared (**Sup. Fig. S2; Scheme-3**), where phenyl group (ring B) was placed  
357 at the 4<sup>th</sup> position of ring A and varying the substitution pattern at 5<sup>th</sup> position (ring B).  
358 In series-2, six analogs AP(S5-S10) were prepared by modifying both 4<sup>th</sup> and 5<sup>th</sup>  
359 positions (**Sup. Fig. S2; Scheme-4**). Apart from these, another analog **AP-S11**  
360 (**Sup. Fig. S2; Scheme-2**) was also synthesized where -CF<sub>3</sub> was maintained at the  
361 6<sup>th</sup> position and substituted aryl rings at 4<sup>th</sup> and 5<sup>th</sup> positions.

362 All the synthesized molecules were evaluated for their effect on Nef-CD80/CD86  
363 inhibition by ELISA. The analogs **AP(S1-S10)** without -CF<sub>3</sub> group at 6<sup>th</sup> position of  
364 ring A didn't show any activity (**Fig. 7b**), however, the analog **AP-S11** with CF<sub>3</sub> at 6<sup>th</sup>  
365 position of ring A showed the activity. These results disclosed that presence of CF<sub>3</sub>  
366 group at 6<sup>th</sup> position of ring A important for the activity (**Fig. 7c**). Moreover, docking  
367 studies revealed that CF<sub>3</sub>-group showed hydrophobic interactions with non-polar  
368 residues such as W<sub>61</sub>, L<sub>91</sub>, I<sub>114</sub> and L<sub>115</sub> while *in vitro* and *in vivo* experiments  
369 described above, suggested that these interactions are important for at least for the  
370 inhibition of the down modulation capacity of Nef. These studies underline the

371 importance of the -CF<sub>3</sub> group at 6<sup>th</sup> position of ring A (**Fig.7a-c**). In conclusion, lead  
372 compounds with potency in nanomolar range across the cell-based assay along with  
373 acceptable solubility, permeability and pharmacokinetics parameters necessary for  
374 further drug development and chemical perturbation of the Nef-CD80 interface, have  
375 been developed.

376

## 377 **Discussion**

378 HIV-Nef plays an important role in the pathogenesis of HIV infections and  
379 understanding its many functions in modifying the host cell surface has served as a  
380 focal point of HIV research<sup>38,39</sup>. In earlier work we had determined that the presence  
381 of wild type Nef in virus infected cells, promotes the loss of the co-stimulatory  
382 proteins CD80/86 from the infected APC surface resulting in a loss of naïve T-cell  
383 activation<sup>23, 24, 25, 40</sup>. Here we have identified potent small molecules that disrupt the  
384 interaction of Nef with CD80 co-stimulatory receptors, and restore T-Cell activation  
385 potential of virus-infected APCs. The three lead structures identified: **AP5**, **BC5** and  
386 **PA4** belonged to three diverse scaffolds. While **PA4** and **BC5** are able to inhibit  
387 both Nef mediated CD80 as well as MHC1 down-regulation, possibly indicating  
388 different interaction points in Nef or counteracting Nef at more than one protein-  
389 protein interface. **PA4** and **BC5** molecules are leads to explore for molecular  
390 interaction promiscuity and investigating some of the multiple interactions of Nef.  
391 Since **AP5** selectively inhibits Nef-mediated CD80 down-regulation, we chose to  
392 pursue its detailed characterization in this study,

393

394 To gain an insight into the interactions of Nef with CD80, computational approaches  
395 followed by experimental validation were used to identify possible binding sites on

396 Nef for both CD80 peptide and the small molecule inhibitor **AP5**. Due to the lack of  
397 crystals with suitable diffraction properties to provide high-resolution structures, and  
398 limited experimental information on full length Nef structure, possibly due to its  
399 inherent flexibility we adopted a computational strategy. Full length Nef was modeled  
400 by a multi-template computational approach, and their spatial conformation was  
401 validated using the constraints obtained from SAXS experiments. The interaction site  
402 for CD80 was obtained by docking of CD80 cytoplasmic tail with full length Nef  
403 model, and a number of possible binding sites for its already known protein-protein  
404 interaction sites were identified. These predictions provide key insights that could be  
405 correlated with the experimental results, identifying key residues that are involved in  
406 Nef-CD80 interaction. A caveat to be noted is that there is a limitation in finding the  
407 best biologically relevant orientation of CD80 since the docking was restricted to only  
408 the cytoplasmic tail peptide of CD80 which does not impose spatial conformation of  
409 the full length CD80 embedded in the membrane. The free cytoplasmic CD80 region  
410 fits in the energetically favorable orientation, given its steric constraints, providing  
411 verifiable insights from mutation studies. In parallel the **AP5** docking results confirms  
412 that  $W_{61}$  and  $K_{99}$  residues of Nef contributes to the interaction interface with this lead  
413 molecule. Based on the Nef-CD80 and Nef-**AP5** docking results, hotspot residues  
414 such as  $W_{61}$ ,  $K_{99}$  and  $R_{111}$  were mutated. This revealed that the  $K_{99}$  and  $R_{111}$   
415 residues are crucial for CD80 binding and additionally,  $W_{61}$  plays an important role in  
416 **AP5** binding. Since the binding sites for CD80 and **AP5** are overlapping, our study  
417 provides a plausible view of the inhibitory mechanism, where AP5 interactions with  
418 Nef would prevent its ability to associate with CD80, since they compete for the  
419 same site. Ongoing efforts are aimed at improving the inhibitors with  $-CF_3$  group in  
420 **AP5** series and further validating these hits in *in vivo* studies.

421

422 Our results also indicate that Nef interaction with the co-stimulatory receptors  
423 CD80/86 cytoplasmic tails are distinct from reported Nef –MHC-I interactions. Nef  
424 interacts with MHC-I cytoplasmic via E<sub>62-65</sub> and P<sub>78</sub> residues<sup>41</sup>, although subtype C  
425 as shown here may utilize W<sub>61</sub> and R<sub>111</sub>. While Nef-MHC-1 interactions are  
426 important, Chaudhry *et al*<sup>24</sup> showed that the kinetics of Nef down-modulation of MHC  
427 molecules is slow as compared to the loss of co-stimulatory CD80/86 function. We  
428 have shown that the interaction of Nef with the co-stimulatory CD80/86 is likely to be  
429 critical for inhibiting the priming of the immune system towards naïve infections, and  
430 hence may be critical for immune evasion strategy of the virus<sup>42,43</sup>. The chemical  
431 tools developed here will allow such an interrogation in suitable animal models.

432

433 Once developed into drug-like chemicals, the leads we have identified from this  
434 study would have significant impact in at least two scenarios where macrophages  
435 play an important role for HIV-1 pathogenesis. One important application is in  
436 maternal–fetal transmission and other in cases of early infection or persistent  
437 infection resulting from viral mutations. 90% of HIV infection in children is through  
438 Macrophage-tropic Maternal-fetal Transmission<sup>44</sup>. Nef plays a major role in vertical  
439 transmission of Macrophage-tropic HIV-1 in mother to child, where the motifs for  
440 receptor modulation were conserved in mother-to-infant *NEF* sequences. The  
441 second scenario is in early stages of infection when viral load is low, the role of Nef-  
442 mediated CD80 and CD86 down modulation from the antigen-presenting cell surface  
443 could delay the onset of T-cell responses to provide the virus with a time window  
444 sufficient for expansion. There is evidence that T-cells need co-stimulatory  
445 molecules for optimal killing of target cells, thus even in cases of established

446 infection the removal of CD80 and CD86 from infected cell surfaces could reduce the  
447 efficiency of T-cell responses<sup>45</sup>. If this is the case, blockade of this function by small-  
448 molecule inhibitors of Nef-CD80/CD86-cytosolic tail interactions, could enhance  
449 effectors antiviral immunity and delay the onset of disease in both pathophysiological  
450 contexts.

451

452 Altogether, targeting this protein-protein interaction interface represents a promising  
453 new therapeutic approach to bring forth a first in class set of inhibitors to foreshorten  
454 the infection burden in HIV-1. The information gained from this integrated approach  
455 of both computational and experimental study have set the foundation for further  
456 ongoing efforts in synthesizing the next series of more drug-like inhibitors. We have  
457 demonstrated a promising chemical starting point for building chemical tools and  
458 drugs that can interfere with immunomodulatory consequences of HIV-1.

459

## 460 **Significance**

461 Our study aims to develop small molecule inhibitors that disrupt the interaction  
462 interface between HIV-1 viral protein Nef and host CD80 / CD86 in Antigen  
463 Presenting Cells (APC). The disruption of this interaction will makes infected APCs  
464 more visible to the immune system, increasing cytotoxic lymphocyte activity on these  
465 HIV-infected cells, potentially leading to viral clearance from macrophage reservoirs.  
466 Here we identify and structurally characterize small molecule inhibitors that indeed  
467 disrupt the protein-protein interaction interface of Nef-CD80 and restore the T-cell  
468 activation capacity of infected APCs. These chemical tools serve as excellent  
469 starting points that may be used to interrogate the role of Nef in HIV immune evasion  
470 and contribute to first-in-class drugs for mitigating this resurgent disease

471 **Acknowledgments**

472 This work was funded by the BIRAC-CRS grant (BT/CRS0045/CRS -02/12), J.C.  
473 Bose Fellowship from the Department of Science and Technology to SM,  
474 Government of India, IIMM funds CSIR Research grants GAP-2116 and HCP-0001.  
475 Center for Chemical Biology & Therapeutics fund (sanction order no.  
476 BT/PR7222/MED/31/1901/2012, dated 11.01.2013), and support from the  
477 Department of Atomic Energy (Government of India) under Project No. RTI 4006 to  
478 NCBS. We thank Drs. Satyajit Rath, Ramaswamy Subramanian and Shahid Jameel  
479 for helpful discussions. We also thank M. Hurakadli, J. Subbarao, P.Kumar for their  
480 technical assistance. The facilities provided by the Bangalore Life Science (BLiSc):  
481 Biosafety-I & II, CIFF, Instrumentation, X-ray facilities have greatly supported this  
482 work.

483 **Author contributions**

484 SM, ASK, TS, PPS and RAV contributed to project initiation and funding.  
485 SM and ASK contributed to the study design of biochemical screen and cell-based  
486 assays. PPS and RAV contributed to the medicinal chemistry study design. ARV  
487 contributed to the structural biology study design and supported this work at the  
488 CCBT. AUS, APN and AM contributed to compound screening and cell-based  
489 experimental work. SS, SA, GM, KRY and PPS contributed to chemical synthesis  
490 and structure activity relationship analyses. GA and RS contributed to the molecular  
491 modeling and docking studies. SR contributed to mutant study. NK performed the  
492 SAXS studies. SM, AUS and ASK wrote the manuscript, which was reviewed by  
493 RAV and ARV. Figures were prepared by AUS, SS, PPS, GA and NK.

494 **Declaration of Interests**

495 The authors declare No competing interest.

496  
497

## 498 **Figure Legends**

499  
500

### **Fig. 1 Nef directly interacts with the cytoplasmic tail peptides of CD80/86.**

501 **a)** Illustration shows the CD80 and CD86 receptors with their extracellular,  
502 transmembrane and cytosolic tail region marked. The 20-mer peptide region of CD80  
503 (PRCRERRRNERLRRESVRPV, 269 to 288 a.a) and CD86  
504 (LWKWKKKKRPRNSYKCGTNT, 267-286 a.a) is highlighted within the cytoplasmic  
505 tail domain **(b)** Graph shows direct binding of Nef to CD80 as measured by  
506 Microscale scale thermophoresis (MST). CD80 peptide was titrated from 950  $\mu$ M in  
507 2-fold dilutions upto 16 points against a fixed Nef concentration (35 nM) in the final  
508 reaction volume. A curve with upper saturation with  $k_D=27 \mu$ M was obtained; x axis=  
509 peptide concentration (nM) and y axis= percentage normalized fluorescence  
510 ( $\Delta F_{norm}$ ); Plots represent the mean  $\pm$  SD (error bars) from three independent  
511 experiments **(c)** Similarly, CD86 peptide was titrated from 10  $\mu$ M with a 2-fold serial  
512 dilution upto 16 points against a fixed Nef concentration (35 nM). A sigmoidal curve  
513 with  $k_D=112$  nM, showing higher affinity as compared to CD80. **(d)** Graph shows  
514 ELISA assay where change in OD is observed when the immobilized CD80 and  
515 CD86 cytosolic peptides binds to Nef. The OD measurement was done at 450nm.  
516 CD74, a negative peptide control shows minimal OD value **(e)** Graph shows  
517 Normalized Percentage Index (NPI) on a normal distribution curve for statistical  
518 significance of active compounds across qualified plates showing CD80 actives. X  
519 axis= the number of compounds screened in ELISA assay; y axis= normalized  
520 percentage Inhibition of compounds; of Z-factor>0.5 analysis was used to qualify the  
521 plates. Compounds with NPI>30% for CD80 was considered as hits **(f)** Similarly,



522 NPI normal distribution curve for CD86 with Cutoff percentage for CD86 NPI>20%  
523 was considered as hits **(g)** Scheme shows the hits belonging to 9 scaffolds that  
524 were identified in the primary screen **(h)** Dose response curve of a hit compound  
525 from “AP” scaffold; x axis= log concentration of compounds; y axis= Normalized  
526 percentage Inhibition, (inset) Structure of AP5 compound and its molecular  
527 properties

528 **Fig. 2: Cell based assay screening of active compounds from ELISA.**

529 **(a)** Nef mediated down-regulation of surface CD80 or CD86 in 3 different cell lines as  
530 indicated. FACS data showing the normalized surface levels of CD80;  $I_x/I$  (y axis)  
531 where  $I_x$  is the average fluorescence intensity in the indicated condition (from a  
532 triplicate) and  $I$  is the Median of normalized negative control (No Nef control) **(b)**  
533 FACS data shows restoration of CD80 receptors in RAJI cell line after pre-treatment  
534 with 3 representative compounds **AP5, PA4 and BC5** at 10 and 100  $\mu$ M for 24 h and  
535 analysis after 2 h post Nef protein delivery **(c)** RAJI cell line was infected with viral  
536 particles (Nef-YFP and YFP alone control cells) in viral infection assay and surface  
537 CD80 receptors with compounds were measured by flow cytometry **(d)** Effects of  
538 inhibitors on Nef-MHC-I interactions. RAJI cells were treated with compounds at 100  
539  $\mu$ M and then stained with anti-MHC-I antibody. MHC-I was detected by flow  
540 cytometry and shown as  $I_x/I$  plots. Compound **AP5** shows no restoration of MHC-I  
541 indicating its specificity for the Nef-CD80 interface.

542 **Fig. 3: Restoration of functional T-cell activation in a viral infection assay**

543 **(a)** Schematic of a functional assay for screening of compounds that disrupt Nef-  
544 CD80/86 interactions in a virally-infected cell. Functional T-Cell activation is based  
545 on APC-T cell co-cultures. The APC has CD80/86 and concurrent presence of anti-  
546 CD3 antibody promotes T-cell activation (as measured via IL-2) in co-cultured T-cells

547 **(b)** Graph shows cytokine release in functional T-cell activation assay where antigen  
548 presenting cell RAJI (B-cells) and Jurkat-cells (T cells) were co-cultured as indicated  
549 (with/without anti-CD3 antibody); T-cells alone, B-cells alone controls do not show  
550 measurable IL-2 release. **(c)** Graph shows quantification of cytokine (IL-2) released  
551 after T-cells and B-cells co-culture for 3 h; here B-cells were pretreated with the  
552 indicated concentrations (1, 10, 100  $\mu$ M) of compounds for 24 h followed by viral  
553 infection for 96 h **(d)** Graph shows quantification of cytokine (IL-2) released after T-  
554 cells and B-cells co-culture for 3 h; here B-cells were first infected with virus for 96h  
555 and then treated with compounds at 1, 10, 100  $\mu$ M for 24 h. IL-2 release (pg/ml) was  
556 determined by ELISA by plotting against an IL-2 standard curve. Note: viral infection  
557 reduces IL-2 release, and all 3 compounds showed a dose dependent restoration of  
558 IL-2 release. **AP5** showed IL-2 release at 1  $\mu$ M.

#### 559 **Fig. 4: Modelling of Nef with multi-template computational approach**

560 **(a)** Cartoon representation of the predicted structure of Nef shows flexible N-terminal  
561 region and well-conserved core domain, colored in accordance with their position (N-  
562 terminal in blue to C-terminal in red) with respective  $\alpha$ -helices and  $\beta$ -sheets as  
563 indicated. **(b)** The *ab initio* shape of the solution structure of the Nef (blue color) from  
564 the SAXS data (grey surface) fits well with the computational model (cartoon  
565 representation) **(c)** Surface representation of HIV-1 Nef is depicted with the best  
566 CD80 binding pose. CD80 peptide in a docked pose (cyan color) in Nef obtained  
567 using SiteMap program. The inset shows the important residues of Nef involved in  
568 interaction with CD80 at Sites 1 and 2.

#### 569 **Fig. 5: Evaluation of interaction between CD80 and Nef mutants in biochemical** 570 **and cell-based assays**

571 **(a)** Graph shows colorimetric signal of immobilized CD80 cytosolic peptide upon

572 binding to Nef<sup>fWT</sup> or Nef mutants as measured by ELISA at OD450nm. Two mutants  
573 Nef<sup>fK99A</sup> and Nef<sup>fR111A</sup> showed reduced affinity to CD80 peptide **(b)** Graph shows  
574 FACS data of surface levels of CD80 receptors in RAJI cell line after delivery of  
575 Nef<sup>fWT</sup> or Nef mutant protein delivery. No significant down regulation seen with  
576 mutants Nef<sup>fK99A</sup> and Nef<sup>fR111A</sup> **(c)** Graph shows the levels cytokine (IL-2) released in  
577 supernatants of cells in the co-culture functional T-cell activation assay after delivery  
578 of the Nef mutants as compared to the wild type Nef protein. **(d)** Graph shows FACS  
579 data of MHC-1 levels after delivery with Nef<sup>fWT</sup> and mutants. Nef<sup>fWT</sup> or mutants were  
580 delivered into RAJI cells using Chariot<sup>TM</sup> delivery reagent. MHC-I was detected by  
581 flow cytometry and shown as Ix/I plots.

582 **Fig. 6: Structural and functional evaluation of the interaction between Nef and**  
583 **AP5**

584 **(a)** Structural and functional evaluation of the interaction between Nef and AP5  
585 Surface representation of HIV-1 Nef depicting **AP5** ligand (green color) binding. The  
586 binding site of **AP5** molecule overlaps with the CD80 binding site (Site-1). The inset  
587 shows the important residues for the interaction between AP5 and Nef. The non-  
588 polar residues such as W<sub>61</sub>, L<sub>91</sub>, I<sub>109</sub> and L<sub>115</sub> contribute to hydrophobic interactions  
589 with CF<sub>3</sub>. **AP5** ligand docking studies shows that the binding interactions occurs  
590 between the  $\alpha$ 4 and  $\alpha$ 5 helices along with few residues such as W<sub>61</sub>, E<sub>65</sub> and R<sub>111</sub>  
591 which are crucial for **AP5**-Nef interaction **(b)** Graph shows colorimetric signal of  
592 immobilized CD80 cytosolic peptide upon binding to Nef<sup>fWT</sup> or Nef mutants in the  
593 presence /absence of 10  $\mu$ M AP5 as measured by ELISA at OD450 nm. **(g)** Graph  
594 shows surface levels of CD80 receptors in RAJI cell line after the delivery of Nef<sup>fWT</sup> or  
595 Nef mutant protein delivery as measured by FACS in the presence /absence of 10  
596  $\mu$ M AP5. Nef<sup>fW61A</sup>, Nef<sup>fK99A</sup> and Nef<sup>fR111</sup> did not show any further change in CD80

597 levels with **AP5** addition. **(c)** Graph shows cytokine (IL-2) release in supernatants  
598 after the co-culture T-cell activation assay. RAJI cells were pre-treated with 10  $\mu$ M  
599 AP5 for 1 h and then the cells were delivered with Nef mutants or wild type Nef  
600 protein for 2 h before co-culture with Jurkat T-cells for 3 h. The IL-2 levels remain  
601 unchanged with and without addition of **AP5** compound in all three mutants Nef<sup>fW61A</sup>,  
602 Nef<sup>fK99A</sup> and Nef<sup>fR111</sup>. Reduction in IL-2 seen with mutant Nef<sup>fE160A</sup> comparable to  
603 Nef<sup>fWT</sup>.

604 **Fig. 7: SAR and Hit refinement with AP5 as a template (a)** Scheme shows  
605 Medicinal chemistry approach for hit refinement of **AP5** showing two series of  
606 compounds **(b)** Summary of SAR strategy to design compounds similar to **AP5**  
607 **structure** with modifications made on rings A, B and C as indicated. The  
608 synthesized molecules were evaluated for their effect on Nef-CD80/CD86 inhibition  
609 **(c)** Heat map table showing SAR with synthesized compounds. The various  
610 substitutions in rings A, B and C are indicated as well as their activity in the ELISA  
611 and cell-based assays  
612

613 **STAR methods**

614

615 **Materials and Reagents:**

616 96-well maxisorp ELISA plates (NUNC, cat#449824,), small molecule inhibitors  
617 (synthesized by IIIM, Jammu), DMSO (Sigma, cat#D2650), Anti-Nef Antibody (from  
618 ICGEB), DAR-HRP (Jackson Immunoresearch, cat#711-035-152), Tecan ELISA  
619 reader. The following commercially synthesized peptides (Peptron Inc., South Korea)  
620 were used: CD80 cytosolic tail peptide: PRCRERRRNERLRRESVRPV (20-mer),  
621 CD86 cytosolic tail peptide: LWKWKKKKRPRNSYKCGTNT (20-mer), CD74, a non-  
622 specific peptide: MHRRRSRSCREDQKPVMDQDRDLISNNEQL (30-mer). Nef  
623 construct was cloned at ICGEB, rF2-Nef protein (HIV-1 Subtype C) cloned into  
624 pET28 vector (Novagen, cat#69865) at NcoI and XhoI sites with 6XHis tag at C-  
625 terminal end. Nef and all Nef variant proteins were expressed in E. coli Rosetta  
626 strain containing pRARE that codes for t-RNAs corresponding to rare Arginine  
627 codons in the bacterium. The growth and/or expression medium used were Luria  
628 Broth. The antibiotics used were kanamycin (50µg/ml) for Nef plasmid selection and  
629 chloramphenicol (25µg/ul) for pRARE selection, IPTG induction, Akta FPLC –Affinity  
630 and Size exclusion chromatography for protein purification.

631 **Cell lines-** RAJI B lymphocytic, Burkitt's lymphoma cell line (NIH AIDS reagent  
632 cat#ARP-9944), Jurkat T cells (ATCC, cat#TIB-152), for cell-based assays,  
633 HEK293T (ATCC CRL-3216) was used for transfection of viral clones and production  
634 of viral particles.

635 **Cell culture reagents-** RPMI 1640, FBS, glutamine, Penstrep (from Gibco),  
636 Chariot™ delivery reagent (active motif, cat#30100) was used for protein delivery  
637 into cells. Viafect (Promega, cat#E4982) reagent was used for DNA transfection,  
638 lentiX concentrator (clontech, cat#631231), lentiblast reagent (OZ

639 biosciences,cat#LB00500), DMEM (Gibco), WST-1 reagent (Roche), anti-CD80 and  
640 anti-CD86-biotinylated antibody (Ebioscience, cat# 13-0809-82 and 13-0869-82),  
641 SAV-APC (Ebioscience, cat#17-4317-82), anti-CD3 antibody (Biolegend, 317302),  
642 western blot materials (Biorad), Chemiluminescent reagent (Pierce, cat#32109), GE  
643 Image Quant, human IL-2 ELISA kit (Biolegend, cat#431808), Plasmid prep kit  
644 (Qiagen), biotinylated anti-human MHC-I (HLA-A, B, C) antibody (biolegend,  
645 cat#311402).

### 646 **Chemical Compound Synthesis**

647 The 25 active hits belong to three scaffolds namely amino pyrimidine (**AP**), biaryl  
648 (heteroaryl) carbamate (**BC**) and phenoxy acetamide (**PA**) has been selected and  
649 details regarding the strategies applied for the synthesis of hits and hit optimized  
650 compounds has been provided in Scheme 1-8 (Supplementary data).

651 The synthesis started with amino pyrimidine (AP) scaffolds, where five hits were  
652 synthesized and their synthetic strategy has been given in Scheme 1 and 2. The  
653 synthesis started with commercially available 2-chloro-5-bromopyrimidine **1** as the  
654 starting material which was treated with ethanethiol **2** afforded intermediate **3**  
655 (Scheme 1). The intermediate **3** was then subjected to Suzuki coupling with aryl  
656 boronic acid **4** provided 5-aryl pyrimidine **5**. The compound **5** was then oxidized with  
657 *m*-CPBA to corresponding sulfoxide **6** followed by nucleophilic substitution afforded  
658 key intermediate **7**, which on reaction with acetylacetone provided **AP1**. In the next  
659 attempt, the intermediate **7** on reaction with substituted aldehydes provided **AP2** and  
660 **AP3**. In another attempt, the 2-chloro-5-bromopyrimidine **1** was converted into **AP4**  
661 in two steps i) nucleophilic substitution with dimethyl amine; ii) Suzuki coupling with  
662 phenyl boronic acid. The synthesis of **AP5** required the quite different strategy and is  
663 shown in Scheme 2. The synthesis started with commercially available resorcinol **11**

664 which undergoes acetylation followed by reduction gave intermediate **13**. The  
665 intermediate **13** was treated with 4-methoxyphenyl acetonitrile **14** to get acylated  
666 intermediate **15** which on treatment with trifluoroacetic anhydride underwent  
667 cyclization to generate the chromone based key intermediate **16** followed by the  
668 methylation of hydroxyl group to get **17**, which on reaction with guanidine  
669 hydrochloride to afford the hit **AP5**.

670 For the initial hit refinement, we started synthesis with commercially available  
671 2-aminopyrimidine **28** which on reaction with phenyl boronic acid **4b** with  
672 methodology was developed in the presence of light and  $K_2S_2O_8$  gave intermediate  
673 **29**. Intermediate **29** was brominated in the presence of *N*-bromosuccinamide (NBS)  
674 provided the intermediate **30**. The final targeted compounds **AP(S1-S4)** were  
675 synthesized in good to moderate yields from the reaction of compound **30** with  
676 substituted phenyl and heterocyclic boronic acids **4** under Suzuki conditions to  
677 provide final compounds **AP (S1-S4)**, scheme-3). For series-2, sequence of synthesis  
678 began with 2-amino-4-chloropyrimidine **31** which underwent Suzuki coupling reaction  
679 with un/substituted aryl and heteroaryl boronic acids **4** to get intermediate **32** which  
680 on reaction with NBS provided intermediate **33**. The brominated intermediate **33** was  
681 subjected to Suzuki couplings with a range of aryl and heteroaryl boronic acids **4** to  
682 provide final compounds **AP (S5-S10)**, Scheme-4).

683 In the case of biaryl (heteroaryl) carbamate (BC), seven hits were synthesized  
684 (Schemes 5-6). The synthesis started with commercially available  
685 phenylchloroformate **18** which on treatment with benzo[d]oxazole-2(3H)-thione **19** in  
686 the presence of base to give the hit **BC1** (Scheme 5). All other hit molecules from  
687 **BC3** to **BC7** and **BC10** were synthesized in the similar fashion, different substituted

688 chloroformates **18** reacted with substituted anilines **20** to afford the targeted hits  
689 (Scheme 6).

690 In case of phenoxyacetamide (PA), syntheses of eight hits were accomplished as  
691 outlined in Scheme 7 and 8. Hit molecules like **PA2, 3, 5, 6** and **7 (Scheme 7)** were  
692 synthesized in two steps. i) by treating substituted anilines **20** with different  
693 chloroacetyl chloride in the presence of base at room temperature followed by; ii)  
694 coupling with substituted phenols **23**. For the synthesis of hits **PA1, 8 and 10**, the  
695 synthesized involves four steps. The substituted phenols **23** coupled with substituted  
696 2-chloroethylacetate **24** to form intermediate **25**, which on hydrolysis gave  
697 intermediate **26**. The intermediate **26** was converted into corresponding aryl chloride  
698 **27** and then coupled with substituted anilines **20** to get the desired hits **PA1, 8** and  
699 **10** (Scheme 8).

700 The identified hits such as **BC2, 6 and 8**, and **PA4** and **PA9** were not synthesized  
701 and were procured in somewhat large quantities from the original commercial  
702 vendors because of the unavailability of the starting materials. These hits were  
703 characterized by using NMR and Mass spectroscopy and then were taken up for  
704 validation study.

705 **Compound stock and storage-** All compounds were dissolved 100% DMSO to  
706 make a 10mM stock. Multiple aliquots were prepared from mother stock to avoid  
707 multiple freeze-thaw cycles and were stored at -80°C

#### 708 **Expression and Purification of recombinant Nef**

709 HIV-1 Nef gene sequence was cloned into pET28b expression vector with antibiotic  
710 resistance to chloramphenicol (25µg/ml) and kanamycin (50µg/ml) and recombinant  
711 Nef-His tag protein was expressed in *E. coli* Rosetta strain [OD600~0.5-0.6]. IPTG  
712 induction (0.2mM) was done for 4h at 28°C. The cells were spun down at 10000rpm



713 for 15min and pellet stored at -80°C. The protein was purified in 20mM Tris HCl,  
714 150mM, NaCl, 3 mM DTT, 5% glycerol, 0.2% Tween-20 in a Ni-NTA column and gel  
715 filtration chromatography on Sepharose-75pg (GE) in Akta FPLC purifier. Nef protein  
716 with single mutants W61A, K99A, R111 and E160A were designed by site-directed  
717 mutagenesis. The buffer conditions were same as full length WT-Nef.

| Mutant | Primers used                                                                 |
|--------|------------------------------------------------------------------------------|
| W57A   | F: GAT TGT GCT GCG CCG GAA GCG C<br>R: GCG CTT CCG GCG CAG CAC AAT C         |
| K94A   | F: AAA GAA GCG GGG GGA CTG GAA GGG<br>R: CCC TTC CAG TCC CCC CGC TTC TTT     |
| R106A  | F: CTAAGAAAGCGCAAGAGATCCTTGATTTG<br>R: CAAATCAAGGATCTCTTGCGCTTTCTTAG         |
| E155A  | F: GCA GTA GAA GCG GCC AAC GAA GGA G<br>R: CTC CTT CGT TGG CCG CTT CTA CTG C |

718

### 719 **Microscale Thermophoresis (MST)**

720 Full length Nef was labeled with lysine NT-647-NHS fluorescent dye using the  
721 Monolith NT.115 Protein Labeling Kit (NanoTemper Technologies). A Capillary  
722 Scanning was performed to check the optimal fluorescence intensity of the labelled  
723 protein for titration with the ligand. For the direct binding assay, a final concentration  
724 of labelled 35nM Nef protein was titrated against a 16-point 2-fold serial dilution  
725 series starting from 950 µM for CD80 peptide and for CD86 a final concentration of  
726 labelled 25nM Nef protein was titrated against a 16-point 2-fold serial dilution series  
727 starting from 10 µM. The compound was titrated against the protein-peptide at 16-  
728 point dilution. All samples were prepared by centrifuging at 10000 rpm for 5 min at  
729 4°C and 10 µl of the supernatant was loaded into premium glass capillaries  
730 (NanoTemper Technologies). MST runs were performed at MST power of 60% and  
731 excitation power of 50%, using a Monolith NT.115 NanoTemper Technologies. The  
732 data was analyzed using NanoTemper analysis software MO. Affinity Analysis v2.2.4.  
733 Kd values were determined using T-jump and thermophoresis settings. The change

734 in thermophoresis between each sample dilution was represented as normalized  
735 fluorescence ( $\Delta F_{\text{norm}}$ ), which is defined as  $F_{\text{hot}}/F_{\text{cold}}$ , where  $F_{\text{cold}}$  is the control and  
736  $F_{\text{hot}}$  is the experimental condition. The binding kinetics to non-fluorescent ligand  
737 causes a change in thermophoresis which is determined by area in the curve under  
738 steady-state conditions to yield a binding curve.

### 739 **Primary screening by Indirect Enzyme-linked immunosorbent assay (ELISA)**

740 An indirect ELISA was performed to measure the interaction of Nef-CD80/CD86 and  
741 their disruption with addition of compounds. CD80, CD86 and a non-specific control  
742 peptide derived from the cytoplasmic tail of CD74 peptides were separately  
743 immobilized at 10  $\mu\text{M}$  concentration onto 96-well micro-titer plate and incubated  
744 overnight at 4°C. 5% blotto was used as blocking buffer to reduce the background  
745 interference. Blotto was completely removed with PBS-Tween (0.1%) washes. 10  
746  $\mu\text{M}$  of Nef protein and 10  $\mu\text{M}$  of compounds were pre-incubated at RT for 1 hour and  
747 added onto peptide coated wells for 1 hour incubation. Compounds were diluted in  
748 2.5% blotto and were screened at a concentration of 10  $\mu\text{M}$ . After each addition step  
749 PBS-T washes were done. DMSO in 2.5% blotto as vehicle control and plate  
750 background (no coating) were used as negative control. In subsequent steps the  
751 plates were incubated with primary anti-Nef antibody and secondary antibody with  
752 HRP. The TMB substrate was added which reacts with HRP to produce a coloured  
753 product within 15 minutes. The reaction was stopped with 1N sulphuric acid and the  
754 absorbance at 450nm was recorded with Tecan infinite 200 PRO plate reader.  
755 MATLAB 7.5 program was used to pick the active compounds. The program  
756 assessed the robustness of the screened plate using Z-factor (for qualifying plate)  
757 and Z score for active compounds, and Normalized percent inhibition to determine  
758 the compound activity.

759 ***Robustness of screen***

760 The plate controls showing a Z factor >0.5 was considered to qualify for further  
761 analysis. The activity of compounds was determined with the Normalized Percent  
762 Inhibition (NPI) and Z scores were used to assess the efficacy of the compounds in  
763 the screen: Z-score:  $(I_x - \mu D) / \sigma D$

764 Normalized inhibition (NPI):  $((I_x - \mu D) / \mu D) * 100$

765 Where,  $I_x$ : Intensity of triplicate x (first, second or third) represented as either A/B/C

766  $\mu D$ : Mean of negative control

767  $\sigma D$ : Standard deviation of triplicates of negative control

768 The compounds identified as 'hits' in primary screen were defined as those  
769 displaying more than 30% and 20% inhibition for CD80 and CD86 respectively and  
770 two of three repeats of a particular compound should have Z score between - 2 and -  
771 8.

772 ***Determination of IC<sub>50</sub> for active compounds***- The active compounds from primary  
773 screen were tested for dose response with 10-fold dilution for an 11-point curve from  
774 10 $\mu$ M to nanomolar concentration. Compounds showing an IC<sub>50</sub> in nanomolar  
775 concentrations were further tested in cell-based assay.

776 ***WST assay for quantification of cell viability and toxicity***

777 50000 cells per well were seeded in a 96 well plate. 1% Triton X (control) and  
778 compounds were treated at 100  $\mu$ M in triplicates in 100  $\mu$ l media and incubated for  
779 the 24 hours' timepoint. 10  $\mu$ l of WST-1 reagent per well was added and incubated  
780 for 3hrs. Absorbance read at 450nm with reference 620nm. The media alone control  
781 was used to normalize all the wells. The cells alone control was the high control and  
782 triton treated cells were the low control or negative control.

783 The formula used to calculate the percentage toxicity:

784  $(\text{Average}_{(X)} - \text{Average}_{(\text{high control})} / \text{Average}_{(\text{low control})} - \text{Average}_{(\text{high control})}) * 100$

785 Where,  $\text{Average}_{(X)}$  = average OD of individual test;  $\text{Average}_{(\text{high control})}$  = average OD

786 of cells alone control;  $\text{Average}_{(\text{low control})}$  = average OD of cells with 1% triton X

787 **Measurement of surface levels of CD80/CD86 receptor by flow cytometry**

788 Nef protein was delivered into RAJI B cells using Chariot™ protein delivery reagent

789 according to manufacturer's protocol (Active Motif). In brief,  $1.5 \times 10^5$  cells were

790 layered with protein-delivery reagent complex, incubated and complete media

791 (RPMI+10% FBS) was added. The cells were then harvested and stained with CD80

792 or CD86 biotinylated antibody or isotype control followed by Streptavidin-APC at 4°C

793 and flow profile acquisition was done on Gallios Flow Cytometer (Beckman Coulter).

794 Data was analyzed by FlowJo LLC software. Surface levels of CD80 and CD86 was

795 calculated by normalizing raw fluorescent measurements relative to controls

796 (Normalized Inhibition of Down-regulation). To test compounds, two concentrations

797 10 and 100µM were pre-treated on cells for 1 hour and then 50 µg of Nef was

798 delivered with method described and quantified by flow cytometry.

799 The potential actives from the plates were selected based on the following metrics.

800 a) Z score: 
$$\frac{I_x - \mu_D}{\sigma_D}$$

801 Where  $I_x$  is the measurement of each triplicate,  $\mu_D$ : mean of population and  $\sigma_D$ :

802 Standard deviation of population (excluding the positive and negative control). Z

803 score was used to select hits reversal of CD80/86 downregulation by Nef.

804 Compound repeats were qualified by Z score selection, with a Z score between 1.5

805 to -1.2. Each graph was calculated with student t-test using Graphpad prism 7.0 (\*p

806  $\leq 0.05$ ; \*\* $p \leq 0.01$ ; \*\*\* $p \leq 0.001$ ) was used to determine the significant difference  
807 between the means of control group and treatment groups.

808 **Calculation of surface CD80 and CD86 down regulation-** was calculated by  
809 normalizing raw fluorescent measurements relative to controls (Normalized Inhibition  
810 of Down-regulation)

$$811 \quad \text{NID} = I_x / I$$

812 Where  $I_x$ , is the raw measurement each triplicate and  $I$  is the mean of the  
813 measurements on the positive control.

#### 814 **Virus particle generation**

815 *HEK293T transfection:* The 4 retroviral components present in the following  
816 plasmids, pVSV-G (envelope), p-gag-pol (packaging), pMSCV-Nef-YFP (HIV-1 F2  
817 isolate-based retroviral clones harboring nef sequence), pMSCV-YFP (control) were  
818 transfected into individual recombinant bacteria and cultured in LB for plasmid  
819 isolation (miniprep Qiagen). The plasmid concentration was checked by  
820 NanoDrop™.

821 *Virus particle generation:* To generate recombinant retroviral particles, HEK293T  
822 were seeded into 100mm dish with  $5 \times 10^6$  cells on day 1. At 80% confluency, Viafect  
823 ™ transfection reagent with 15 $\mu$ g of DNA vectors consisting of p-gag pol, pVSV-G  
824 and YFP or Nef-YFP in 3:1:4 ratios was layered over cells with DMEM (5% FBS).  
825 The cells are incubated for 72h. The cells were observed under fluorescence  
826 microscope for YFP expression to estimate the percentage transfection. The cell  
827 supernatant was collected and concentrated with Lenti-X™ reagent (as per  
828 manufacturer's protocol). The visible pellet was reconstituted with minimal volume of  
829 PBS (1X) to make a concentrated viral stock. The stock was titrated in 3-fold serial  
830 dilution onto HEK293T ( $1 \times 10^5$ ) cells/ well in a 24 well plate. Polybrene (8 $\mu$ g/ml) was

831 added to cells along with DMEM (5%FBS) media. After 72h, the cells were harvested  
832 and analyzed on Gallios flow cytometer. The fluorescent population was gated and  
833 analyzed against the cells alone. The infection percentage above 30% and below  
834 0.5% is omitted. The higher titer tends to be underestimated; lower titer falls too  
835 close to the background. The average of the titer was used to calculate the viral units  
836 present in the stock using the low formula:

837

$$\text{TU/ml} = \frac{\left\{ \text{Number of target cells (count at day1)} \times \frac{\% \text{ of YFP-positive cells}}{100} \right\}}{\text{Volume of supernatant in ml}}$$

838

839 **Functional T-cell activation Assay** - RAJI cells were infected with MOI-0.02 of viral  
840 stock of control YFP virus or Nef-YFP containing virus and incubated in a 24-well cell  
841 bind plate. Additionally, LentiBlast™ reagent A and B was added in 1:1 ratio to the  
842 cells and incubated for 48 to 96h. The cells showed YFP signal post infection. The  
843 cells were harvested and stained for CD80 and CD86 and analyzed by flow  
844 cytometry and the percentage down-modulation of the receptors was calculated with  
845 median values.

846 Virus infected RAJI- cells was co-cultured with Jurkat T cells (1:1 ratio,  $2.5 \times 10^5$  cells)  
847 in the presence of 0.06 µg/mL of anti-CD3 antibody (OKT3 clone, BioLegend®) in  
848 final volume of 200 µl and incubated for 3h for 37°C in a 96 well plate and the  
849 supernatant was harvested by centrifuging twice at 4000 rpm. IL-2 Cytokine release  
850 in the supernatant was quantified by BioLegend® kit-based ELISA method and ODs  
851 were measured in Tecan infinite 200 PRO plate reader.

852 **Testing of compounds in viral assay for functional T-cell activation assay-** Pre-  
853 treatment with compounds **AP5**, **PA4** and **BC5** at 1, 10 and 100  $\mu$ M concentrations  
854 was performed for 24h before Nef viral transduction in RAJI cells. Vehicle control  
855 cells were pre-treated with 0.5% DMSO. Post-treatment of compounds for 24h was  
856 done after 96h of viral infection.

#### 857 **Staining of surface MHC-I antibody**

858 RAJI cells were pre-treated with compounds **AP5**, **PA4** and **BC5** at 100  $\mu$ M and 50  
859  $\mu$ g Nef was delivered with Chariot<sup>TM</sup> reagent. The cells were stained for receptors  
860 with anti-human MHC-I biotinylated (HLA-A, B, C, clone W6/32) BioLegend®  
861 antibody and secondary streptavidin APC and was run on Gallios flow cytometer and  
862 the surface levels MHC-I was quantified. The percentage down regulation recovery  
863 of MHC-I receptors was analyzed.

#### 864 **Modelling of full-length Nef**

865 To build a full-length Nef protein, multi-template modelling approach was performed,  
866 where more than one experimentally determined structure was utilized for building  
867 the model. For the N-terminal part, NMR structure of Nef anchor domain(1QA5) and  
868 for core domain, the NMR structure of HIV-1 Nef (2NEF: A) and X-ray structure HIV-  
869 1 NEF protein, in complex with engineered HCK SH3 domain (3RBB: A) are used as  
870 templates. Among the three templates, major structural information is acquired from  
871 2NEF structure which covers maximum region of core domain. The tool  
872 MODELLER7 (version 9v8) was used to obtain the full-length Nef model. After  
873 modeling, the lowest energy state structure was further energy minimized through  
874 SYBYL (Version 7.1) (Tripos Associates Inc.) and validated using PROCHECK<sup>46</sup>

875 **Deciphering the residues necessary for Nef - CD80 interaction by docking**  
876 **studies**

877 The modeled full-length Nef protein is utilized for examining the potential-ligand  
878 association site using the SiteMap<sup>c</sup> tool in Schrödinger software. SiteMap identifies  
879 potential peptide/ligand binding sites considering van der Waals forces and hydrogen  
880 donor/acceptor characteristics. SiteScore is the most important property generated  
881 by SiteMap, proven to be effective at identifying possible binding sites in 3D  
882 structure. The prediction of the binding site is based on set of properties such as size  
883 of the site, degrees of enclosure by the protein and exposure to solvent, tightness  
884 with which the site points interact with the receptor, hydrophobic and hydrophilic  
885 character of the site. The sitemap predictions are useful in identifying the possible  
886 binding sites of CD80/CD86 cytoplasmic tails.

887 Further, docking studies were performed to identify the interactions of Nef protein  
888 with co-stimulatory molecules CD80/CD86. This was achieved by modelling of  
889 cytoplasmic regions of CD80/CD86 using I-TASSER server and protein-peptide  
890 docking using BioLuminate module in Schrödinger software. Though numerous  
891 information about the Nef interaction sites with other cell surface receptors are  
892 available, the peptide is docked by blind docking approach where no guidance about  
893 residues, that could potentially participate in interaction with CD80 was provided to  
894 the program. The best docked pose is selected by energy minimization followed by  
895 implicit solvent based energy calculations.

896 The protein-peptide docking resulted in 30 best poses of Receptor-ligand complexes.  
897 The predicted poses are ranked based on the maximum number of occurrences of  
898 that particular pose. Since there is no prior information about the binding pattern of  
899 Nef with CD80/CD86, it is necessary to score each pose based on energy  
900 calculations. The association of the protein-peptide complex is estimated by an  
901 automated mechanism of Multi-Ligand Bimolecular Association with Energetics



902 (eMBrAcE) (MacroModel, version 9.6, Schrödinger, LLC, New York, NY, 2008). The  
903 best identified Nef-CD80 binding pose analysed further for important amino acids  
904 involved in the non-bonded interactions which is contributing for binding. In order to  
905 validate the predicted binding mode, best binding small molecule **AP5** was docked  
906 with the full-length Nef model. This was basically achieved by selection of a centroid  
907 point from the predicted Nef-CD80 binding site using Glide docking protocol from  
908 Schrodinger software. The top poses of the docked complexes were further  
909 examined for the non-bonded interactions and best docked score.

#### 910 **SAXS data collection and analysis**

911 SAXS-data of the apo HIV1-Nef was measured with the BIOSAXS-1000 small-angle  
912 X-ray scattering with Kratky camera system, installed on a Rigaku microfocus X-ray  
913 generator (1.5418 Å wavelength). The purified HIV1-Nef at 1, 3 and 5 mg/ml  
914 concentrations were used with buffer containing 50 mM Tris/HCl, pH 7.5, 200 mM  
915 NaCl in a sample volume of 60 µl inside a vacuum tight quartz capillary subjected X-  
916 rays at 25 °C. The data was collected for 30 min and for each measurement a total of  
917 six frames at 5 min intervals were recorded. Corresponding to each protein sample,  
918 data were collected for a buffer under identical experimental conditions, providing a  
919 background scattering curve. The data was then tested for possible radiation damage  
920 by comparing the six data frames and no changes were observed. The scattering of  
921 the buffer was subtracted from the scattering of the sample. All the data processing  
922 steps were performed using the program package PRIMUS<sup>47</sup>. The experimental data  
923 obtained for all protein samples were analyzed for aggregation using the Guinier  
924 region. The forward scattering  $I(0)$  and the radius of the gyration,  $R_g$  were computed  
925 using the Guinier approximation assuming that at very small angles ( $q < 1.3/R_g$ ) the  
926 intensity is represented as  $I(q) = I(0)\exp(-(qR_g)^2/3)$ . These parameters were also

927 computed from the extended scattering patterns using the indirect transform package  
928 GNOM, which provides the distance distribution function  $P(r)$  of the maximum particle  
929 dimension,  $D_{max}$  as well as the radius of gyration,  $R_g$ , qualitative particle motion was  
930 inferred by plotting the scattering patterns in the normalized Kratky plot  
931  $((qR_g)^2(I(q)/I(0))$  vs  $qR_g$ ). Ab initio low-resolution models of the proteins were built by  
932 the program DAMMIF<sup>48</sup> considering low angle data ( $q < 2\text{nm}^{-1}$ ). Ten independent ab  
933 initio reconstructions were performed for each protein and then averaged using  
934 DAMAVER<sup>49</sup>. Superimposition between ab initio reconstruction and atomic model was  
935 performed using the software SUPCOMB<sup>50</sup>.

936 **Statistical Analysis:** Z factor was used for qualifying the plate and t-test was used  
937 for determining the significant data. The plots were prepared using Graph Pad Prism  
938 Ver6.0.

939

940

941 **Supplementary Information**

942 **Supplementary figure legends**

943 **Fig. S1: a)** Sequence of Subtype B and C with overlapping residues and important  
944 residues highlighted (in red) **(b).** Sequence of full length CD80 and CD86, where the  
945 20-mer cytoplasmic peptide used for screening assays are highlighted (in cyan) **(c)**  
946 Schematic of ELISA procedure in microwell plate where the CD80 and CD86  
947 peptides were immobilized. The Nef protein was incubated with the peptide and their  
948 interaction was detected by anti-Nef antibody and secondary antibody with HRP. The  
949 colorimetric signal was quantified with TMB reducing the HRP substrate

950 **Fig. S2:** Detailed chemical synthesis of the hits belongs to the AP, PA and BC  
951 scaffolds. **Note: Details of Characterization of Synthesized compounds and**  
952 **intermediates will be included in the full submission.**

953 **Fig. S3:** Regression graph showing correlation with replicate data  $R^2$  values for hit  
954 compounds in biochemical screen, where  $pIC_{50}$  is the negative log of  $IC_{50}$   
955 expressed in molar units.

956 **Fig. S4:** Graph shows cytotoxicity profile with treatment of compounds. RAJI cell line  
957 was treated at the highest concentration of 100  $\mu$ M for 24 h and the supernatant  
958 collected was estimated for WST assay.

959 **Fig. S5:** FACS histogram shows surface staining of CD80 and CD86 with APC-  
960 tagged specific CD80 or CD86 antibody. Colour representation: Unstained Cells (in  
961 red), Isotype controls -IgG1k for CD80; IgG2b for CD86 (in blue dotted line), cells  
962 with Vehicle control Chariot reagent showing CD80 or CD86 surface expression (in  
963 orange), Protein delivered (in green). The reduction in CD80/CD86 levels are seen  
964 with Nef protein after its delivery into RAJI cells in 2h incubation period. The surface

965 levels of CD80 did not change with the delivery of 100 µg of Ovalbumin and β-  
966 lactoglobulin proteins with Chariot™ reagent.

967 **Fig. S6: Schematic of the reterovirus used for infection assays.** Distribution of  
968 regulatory elements in the HIV-1. (A) Schematic depiction of the HIV-1 genome  
969 containing accessory *vpr*, *vpu*, and *nef* genes. (B) Schematic depiction of reteroviral  
970 vector with Nef transgene. where Env protein used in this reterovirus is VsVg from  
971 pMLV, and Vpr , Vif and Vpu are not present in this vector.

972 **Fig. S7: a)** SAXS-patterns of full length HIV1-Nef at three different concentrations 1,  
973 3 and 5 mg/ml are shown. The Guinier plots at low angles appeared linear and  
974 showed no aggregation (shown in inset) **(b)** The Rg, Dmax and molecular mass of  
975 the full length HIV1-Nef suggest the progressive increase in the Rg, Dmax and  
976 molecular mass values with increasing concentration of Nef. The deviation from a  
977 typical bell-shaped profile depicts an inherent structural flexibility of Nef Protein **(c)**  
978 The averaged ab initio model (surface representation) overlay with the crystal  
979 structure of folded C-terminal core (cartoon representation).

980 **Fig. S8: a)** SDS-PAGE run with purified Nef proteins. Nef wildtype and mutants show  
981 bands at ~29kDa **(b)** FPLC purification profile of Nef proteins purified (c) Western  
982 blot showing Nef WT or mutant Nef protein delivered in RAJI cells post 5 h. Band  
983 intensity of Nef<sup>W61A</sup> protein reduced after 5 h when compared to 2 h incubation,  
984 indicating degradation of protein.

985 **Supplementary tables:**

986 **Suppl. Table 1:** a) Table shows 20 compounds selected from screen showing IC<sub>50s</sub>  
987 in sub-micromolar ranges.  Of these top 10 were chosen based on ease of  
988 synthesis , efficacy and their cytotoxicity.

989 **Suppl. Table 2:** Table showing the SAXS derived parameters such as Guinier Rg,  
990 Realspace Rg and Dmax for the full-length Nef in solution  
991 **Suppl. Table. 3:** Table showing the residue information about the CD80 peptide  
992 docked predicted sites on Nef from SiteMap program. The important residues  
993 involved in protein-protein interactions are highlighted.  
994

## References

1. Tsibris, A. M. N. & Hirsch, M. S. MINIREVIEW Antiretroviral Therapy in the Clinic □. **84**, 5458–5464 (2010).
2. Gulick, R. M. & Flexner, C. Long-Acting HIV Drugs for Treatment and Prevention. (2019).
3. Kumar, A. & Herbein, G. The macrophage: a therapeutic target in HIV-1 infection. *Mol. Cell. Ther.* **2**, 10 (2014).
4. Baxter, J. *et al.* Global HIV-1 transmitted drug resistance in the INSIGHT Strategic Timing of AntiRetroviral Treatment (START) trial. *HIV Med.* **16**, 77–87 (2015).
5. Niessl, J. *et al.* Combination anti-HIV-1 antibody therapy is associated with increased virus-specific T cell immunity. *Nat. Med.* **26**, 222–227 (2020).
6. Pollara, J., Easterhoff, D. & Fouda, G. G. Lessons learned from human HIV vaccine trials. *Curr. Opin. HIV AIDS* **12**, 216–221 (2017).
7. Restouin, A. *et al.* Protein – protein interaction inhibition ( 2P2I ) combining high throughput and virtual screening : Application to the HIV-1 Nef protein. **104**, (2007).
8. Flexner, C. Modern Human Immunodeficiency Virus Therapy : Progress and Prospects. **105**, 61–70 (2019).
9. Jäger, S. *et al.* Global landscape of HIV – human protein complexes. **481**, 365–370 (2013).
10. Arhel, N. J. & Kirchhoff, F. Implications of Nef: Host Cell Interactions in Viral Persistence and Progression to AIDS. in *HIV Interactions with Host Cell Proteins* (eds. Spearman, P. & Freed, E. O.) 147–175 (Springer Berlin Heidelberg, 2009). doi:10.1007/978-3-642-02175-6\_8

11. Peter, F. HIV nef: The mother of all evil? *Immunity* **9**, 433–437 (1998).
12. Basmaciogullari, S. & Pizzato, M. The activity of Nef on HIV-1 infectivity. *Front. Microbiol.* **5**, 1–12 (2014).
13. Rahim, M. M. A., Hanna, Z., Hu, C., Jolicoeur, P. & Chrobak, P. Adult AIDS-Like Disease in a Novel Inducible Human Immunodeficiency Virus Type 1 Nef Transgenic Mouse Model: CD4+ T-Cell Activation Is Nef Dependent and Can Occur in the Absence of Lymphopenia. *J. Virol.* **83**, 11830–11846 (2009).
14. Greenway, A. L., Mills, J., Rhodes, D., Deacon, N. J. & McPhee, D. A. Serological detection of attenuated HIV-1 variants with nef gene deletions. *Aids* **12**, 555–561 (1998).
15. Dyer, W. B. *et al.* Strong human immunodeficiency virus (HIV)-specific cytotoxic T-lymphocyte activity in Sydney Blood Bank Cohort patients infected with nef-defective HIV type 1. *J Virol* **73**, 436–443 (1999).
16. Birch, M. R. *et al.* An examination of signs of disease progression in survivors of the Sydney Blood Bank Cohort (SBBC). *J. Clin. Virol.* **22**, 263–270 (2001).
17. Brambilla, A. *et al.* Defective nef alleles in a cohort of hemophiliacs with progressing and nonprogressing HIV-1 infection. *Virology* **259**, 349–368 (1999).
18. Tribble, R. P. *et al.* Allosteric Loss-of-function Mutations in HIV-1 Nef from a Long-term Non-progressor. *J. Mol. Biol.* **374**, 121–129 (2007).
19. Das, S. R. & Jameel, S. Biology of the HIV Nef protein. *Indian J. Med. Res.* **121**, 315–332 (2005).
20. Swingler, S., Brichacek, B., Jacque, J. & Ulich, C. HIV-1 Nef intersects the macrophage CD40L signalling pathway to promote resting-cell infection. **424**, 213–219 (2003).

21. Pereira, E. A. & daSilva, L. L. P. HIV-1 Nef: Taking Control of Protein Trafficking. *Traffic* **17**, 976–996 (2016).
22. Roeth, J. F. & Collins, K. L. Human Immunodeficiency Virus Type 1 Nef : Adapting to Intracellular Trafficking Pathways. **70**, 548–563 (2006).
23. Landi, A., Iannucci, V., Van Nuffel, A., Meuwissen, P. & Verhasselt, B. One Protein to Rule them All: Modulation of Cell Surface Receptors and Molecules by HIV Nef. *Curr. HIV Res.* **9**, 496–504 (2011).
24. Chaudhry, A. *et al.* The Nef Protein of HIV-1 Induces Loss of Cell Surface Costimulatory Molecules CD80 and CD86 in APCs. *J. Immunol.* **175**, 4566–4574 (2005).
25. Chaudhry, A. *et al.* A Two-Pronged Mechanism for HIV-1 Nef-Mediated Endocytosis of Immune Costimulatory Molecules CD80 and CD86. *Cell Host Microbe* **1**, 37–49 (2007).
26. Chaudhry, A. *et al.* HIV-1 Nef promotes endocytosis of cell surface MHC class II molecules via a constitutive pathway. *J. Immunol.* **183**, 7611–7611 (2009).
27. Seidel, S. A. I. *et al.* Microscale thermophoresis quantifies biomolecular interactions under previously challenging conditions. *Methods* **59**, 301–315 (2013).
28. Venzke, S., Michel, N., Allespach, I., Fackler, O. T. & Keppler, O. T. Expression of Nef Downregulates CXCR4, the Major Coreceptor of Human Immunodeficiency Virus, from the Surfaces of Target Cells and Thereby Enhances Resistance to Superinfection. *J. Virol.* **80**, 11141–11152 (2006).
29. Snanoudj, R. *et al.* The blockade of T-cell co-stimulation as a therapeutic stratagem for immunosuppression: Focus on belatacept. *Biol. Targets Ther.* **1**, 203–213 (2007).



30. Geyer, M., Munte, C. E., Schorr, J., Kellner, R. & Kalbitzer, H. R. Structure of the Anchor-Domain of Myristoylated and Non-myristoylated HIV-1 Nef Protein. **4**, (1999).
31. Barnham, K. J., Monks, S. A., Hinds, M. G., Azad, A. A. & Norton, R. S. Solution Structure of a Polypeptide from the N Terminus of the HIV Protein Nef. **2960**, 5970–5980 (1997).
32. Horenkamp, F. A. *et al.* Conformation of the Dileucine-Based Sorting Motif in HIV-1 Nef Revealed by Intermolecular Domain Assembly. 867–877 (2011). doi:10.1111/j.1600-0854.2011.01205.x
33. Geyer, M. & Peterlin, B. M. Domain assembly, surface accessibility and sequence conservation in full length HIV-1 Nef. *FEBS Lett.* **496**, 91–95 (2001).
34. Chi-Hon, L., Saksela, K., Mirza, U. A., Chait, B. T. & Kuriyan, J. Crystal structure of the conserved core of HIV-1 Nef complexed with a Src family SH3 domain. *Cell* **85**, 931–942 (1996).
35. Dikeakos, J. D. *et al.* An interdomain binding site on HIV-1 Nef interacts with PACS-1 and PACS-2 on endosomes to down-regulate MHC-I. (2011). doi:10.1091/mbc.E11-11-0928
36. Viruses, I., Lindwasser, O. W., Chaudhuri, R. & Bonifacino, J. S. Mechanisms of CD4 Downregulation by the Nef and Vpu Proteins of Primate Mechanisms of CD4 Downregulation by the Nef and Vpu Proteins of Primate Immunodeficiency Viruses. (2007). doi:10.2174/156652407780059177
37. Swigut, T., Shohdy, N. & Skowronski, J. Mechanism for down-regulation of CD28 by Nef. *EMBO J.* **20**, 1593–1604 (2001).
38. Pawlak, E. N. & Dikeakos, J. D. Biochimica et Biophysica Acta HIV-1 Nef : a master manipulator of the membrane trafficking machinery mediating immune

- evasion MHC-I Downregulation By Nef MHC-I Secretory Pathway Transport PACS-2 MHC-I. *BBA - Gen. Subj.* **1850**, 733–741 (2015).
39. Buffalo, C. Z., Iwamoto, Y., Hurley, J. H. & Ren, X. crossm. 1–18 (2019).
  40. Khan, N., Gowthaman, U., Pahari, S. & Agrewala, J. N. Manipulation of costimulatory molecules by intracellular pathogens: Veni, Vidi, Vici!! *PLoS Pathog.* **8**, (2012).
  41. Singh, R. K., Lau, D., Noviello, C. M., Ghosh, P. & Guatelli, J. C. An MHC-I cytoplasmic domain/HIV-1 nef fusion protein binds directly to the  $\mu$  subunit of the AP-1 endosomal coat complex. *PLoS One* **4**, 1–7 (2009).
  42. Subauste, C. S., de Waal Malefyt, R. & Fuh, F. Role of CD80 (B7.1) and CD86 (B7.2) in the immune response to an intracellular pathogen. *J. Immunol.* **160**, 1831–40 (1998).
  43. Köchli, C. *et al.* CD80 and CD86 costimulatory molecules on circulating T cells of HIV infected individuals. *Immunol. Lett.* **65**, 197–201 (1999).
  44. Ahmad, N. NIH Public Access. *Life Sci* **88**, 980–986 (2011).
  45. Vanhove, B. Co-stimulatory blockade of the CD28 / CD80-86 / CTLA-4 balance in transplantation : impact on memory T cells ? **6**, 1–11 (2015).
  46. Wishart, D. NMR Spectroscopy and Protein Structure Determination: Applications to Drug Discovery and Development. *Curr. Pharm. Biotechnol.* **6**, 105–120 (2005).
  47. Konarev, P. V *et al.* PRIMUS : a Windows PC-based system for small-angle scattering data analysis PRIMUS : a Windows PC-based system for small-angle scattering data analysis. 1277–1282 (2003).
  48. Franke, D. & Svergun, D. I. DAMMIF , a program for rapid ab-initio shape determination in small-angle scattering. 342–346 (2009).

doi:10.1107/S0021889809000338

49. Volkov, V. V & Svergun, D. I. small-angle scattering. 860–864 (2003).
50. Kozin, M. B. & Svergun, D. I. Automated matching of high- and low-resolution structural models research papers Automated matching of high- and low-resolution structural models. 33–41 (2001).

# Main Figures

# Graphical Abstract

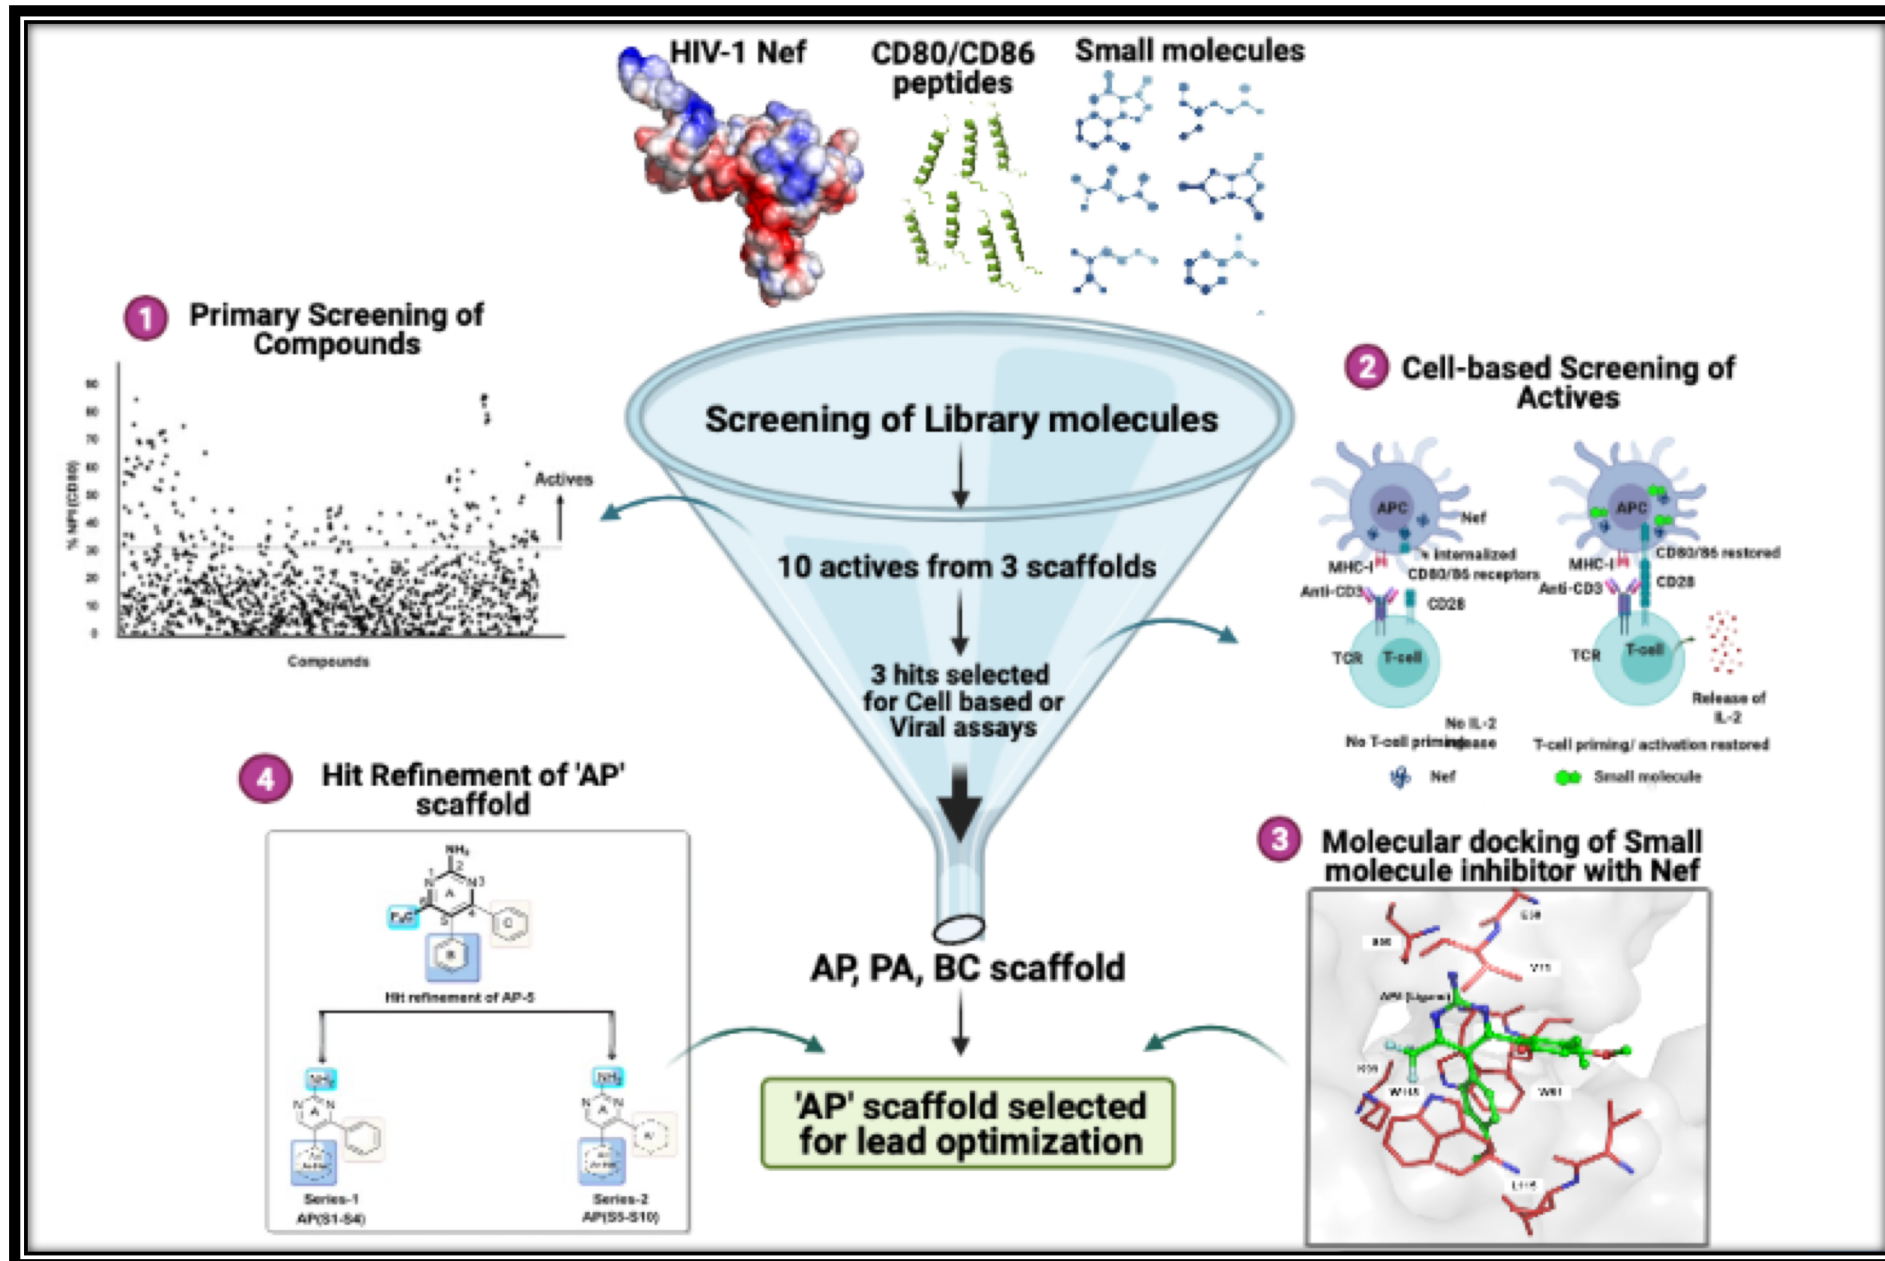

**Fig. 1****a**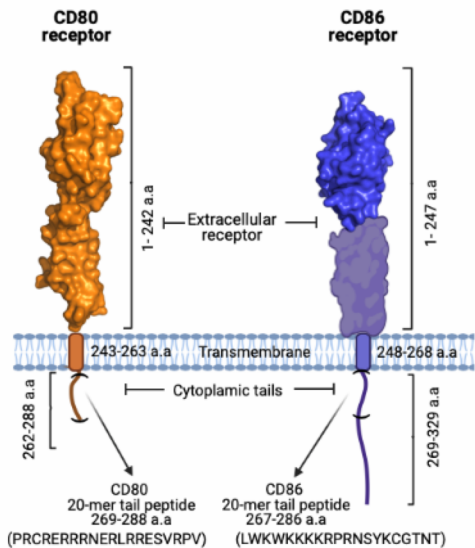**e**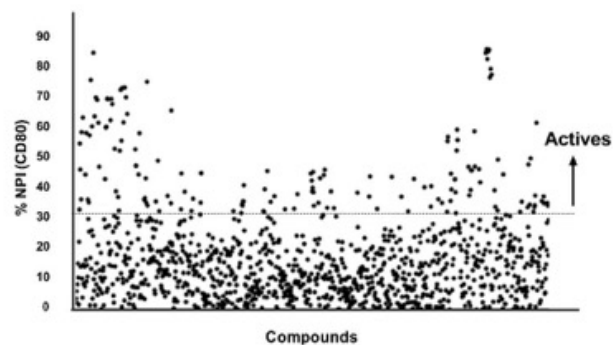**h**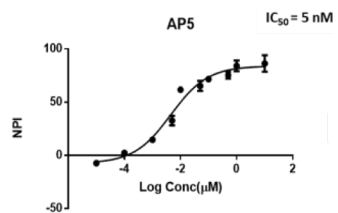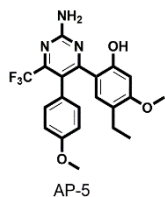

**Amino Pyrimidine-5 (AP-5)**  
**MW: 419**  
**CLogP: 4.3**  
**TPSA: 90.4**  
**NRB: 6**  
**IC50= 5nM**

**b**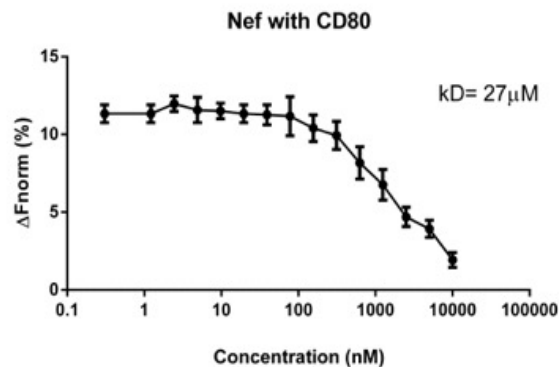**f**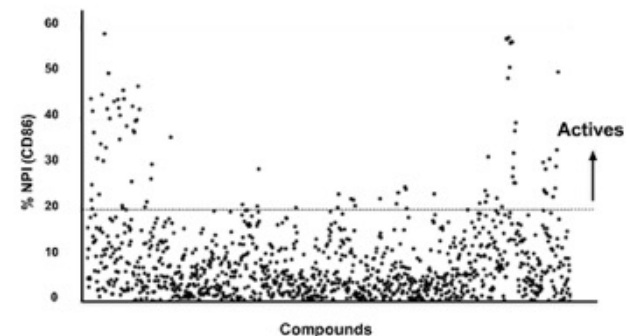**g**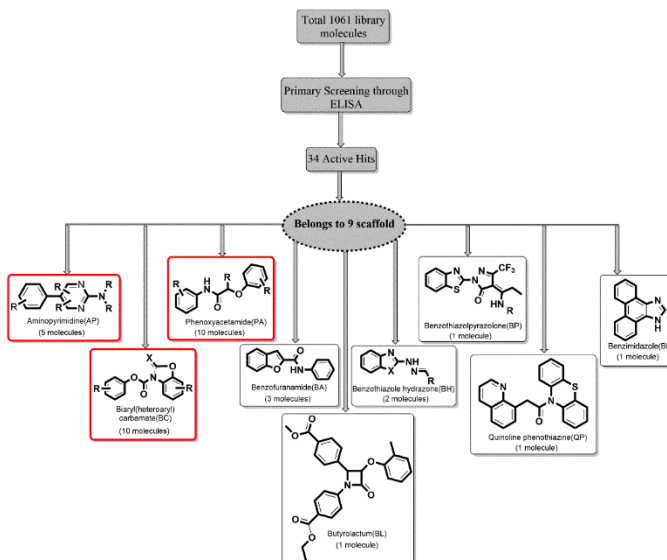**c**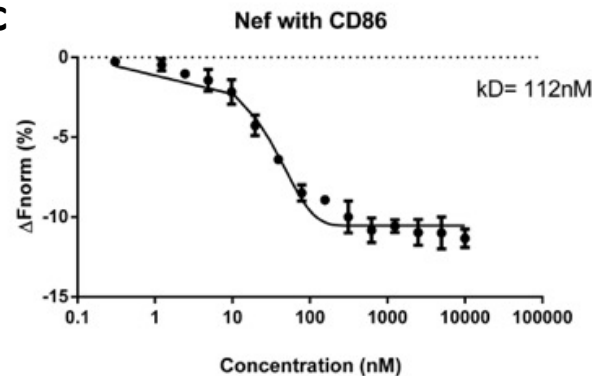**d**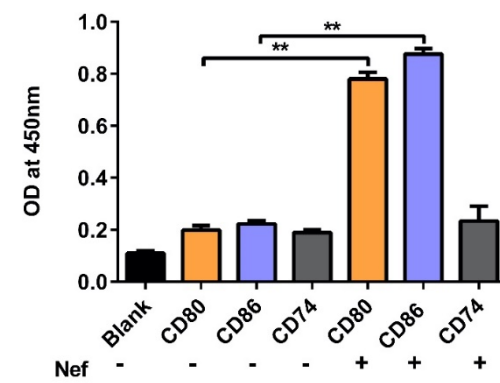**Fig. 1 Nef directly interacts with the cytoplasmic tail peptides of CD80/86.**

a) Illustration shows the CD80 and CD86 receptors with their extracellular, transmembrane and cytosolic tail region marked. The 20-mer peptide region of CD80 (PRCRERRRNERLRRESVRPV, 269 to 288 a.a) and CD86 (LWKWKKKKRPRNSYKCGTNT, 267-286 a.a) is highlighted within the cytoplasmic tail domain (b) Graph shows direct binding of Nef to CD80 as measured by Microscale thermophoresis (MST). CD80 peptide was titrated from 950  $\mu$ M in 2-fold dilutions upto 16 points against a fixed Nef concentration (35 nM) in the final reaction volume. A curve with upper saturation with  $kD=27 \mu$ M was obtained; x axis= peptide concentration (nM) and y axis= percentage normalized fluorescence ( $\Delta F_{norm}$ ); Plots represent the mean  $\pm$  SD (error bars) from three independent experiments.(c) Similarly, CD86 peptide was titrated from 10  $\mu$ M with a 2-fold serial dilution upto 16 points against a fixed Nef concentration (35 nM). A sigmoidal curve with  $kD=112$  nM, showing higher affinity as compared to CD80. (d) Graph shows ELISA assay where change in OD is observed when the immobilized CD80 and CD86 cytosolic peptides binds to Nef. The OD measurement was done at 450nm. CD74, a negative peptide control shows minimal OD value (e) Graph shows Normalized Percentage Index (NPI) on a normal distribution curve for statistical significance of active compounds across qualified plates showing CD80 actives. X axis= the number of compounds screened in ELISA assay; y axis= normalized percentage Inhibition of compounds; of Z-factor>0.5 analysis was used to qualify the plates. Compounds with NPI>30% for CD80 was considered as hits (f) Similarly, NPI normal distribution curve for CD86 with Cutoff percentage for CD86 NPI>20% was considered as hits (g) Scheme shows the hits belonging to 9 scaffolds that were identified in the primary screen (h) Dose response curve of a hit compound from "AP" scaffold; x axis= log concentration of compounds; y axis= Normalized percentage Inhibition, (inset) Structure of AP5 compound and its molecular properties

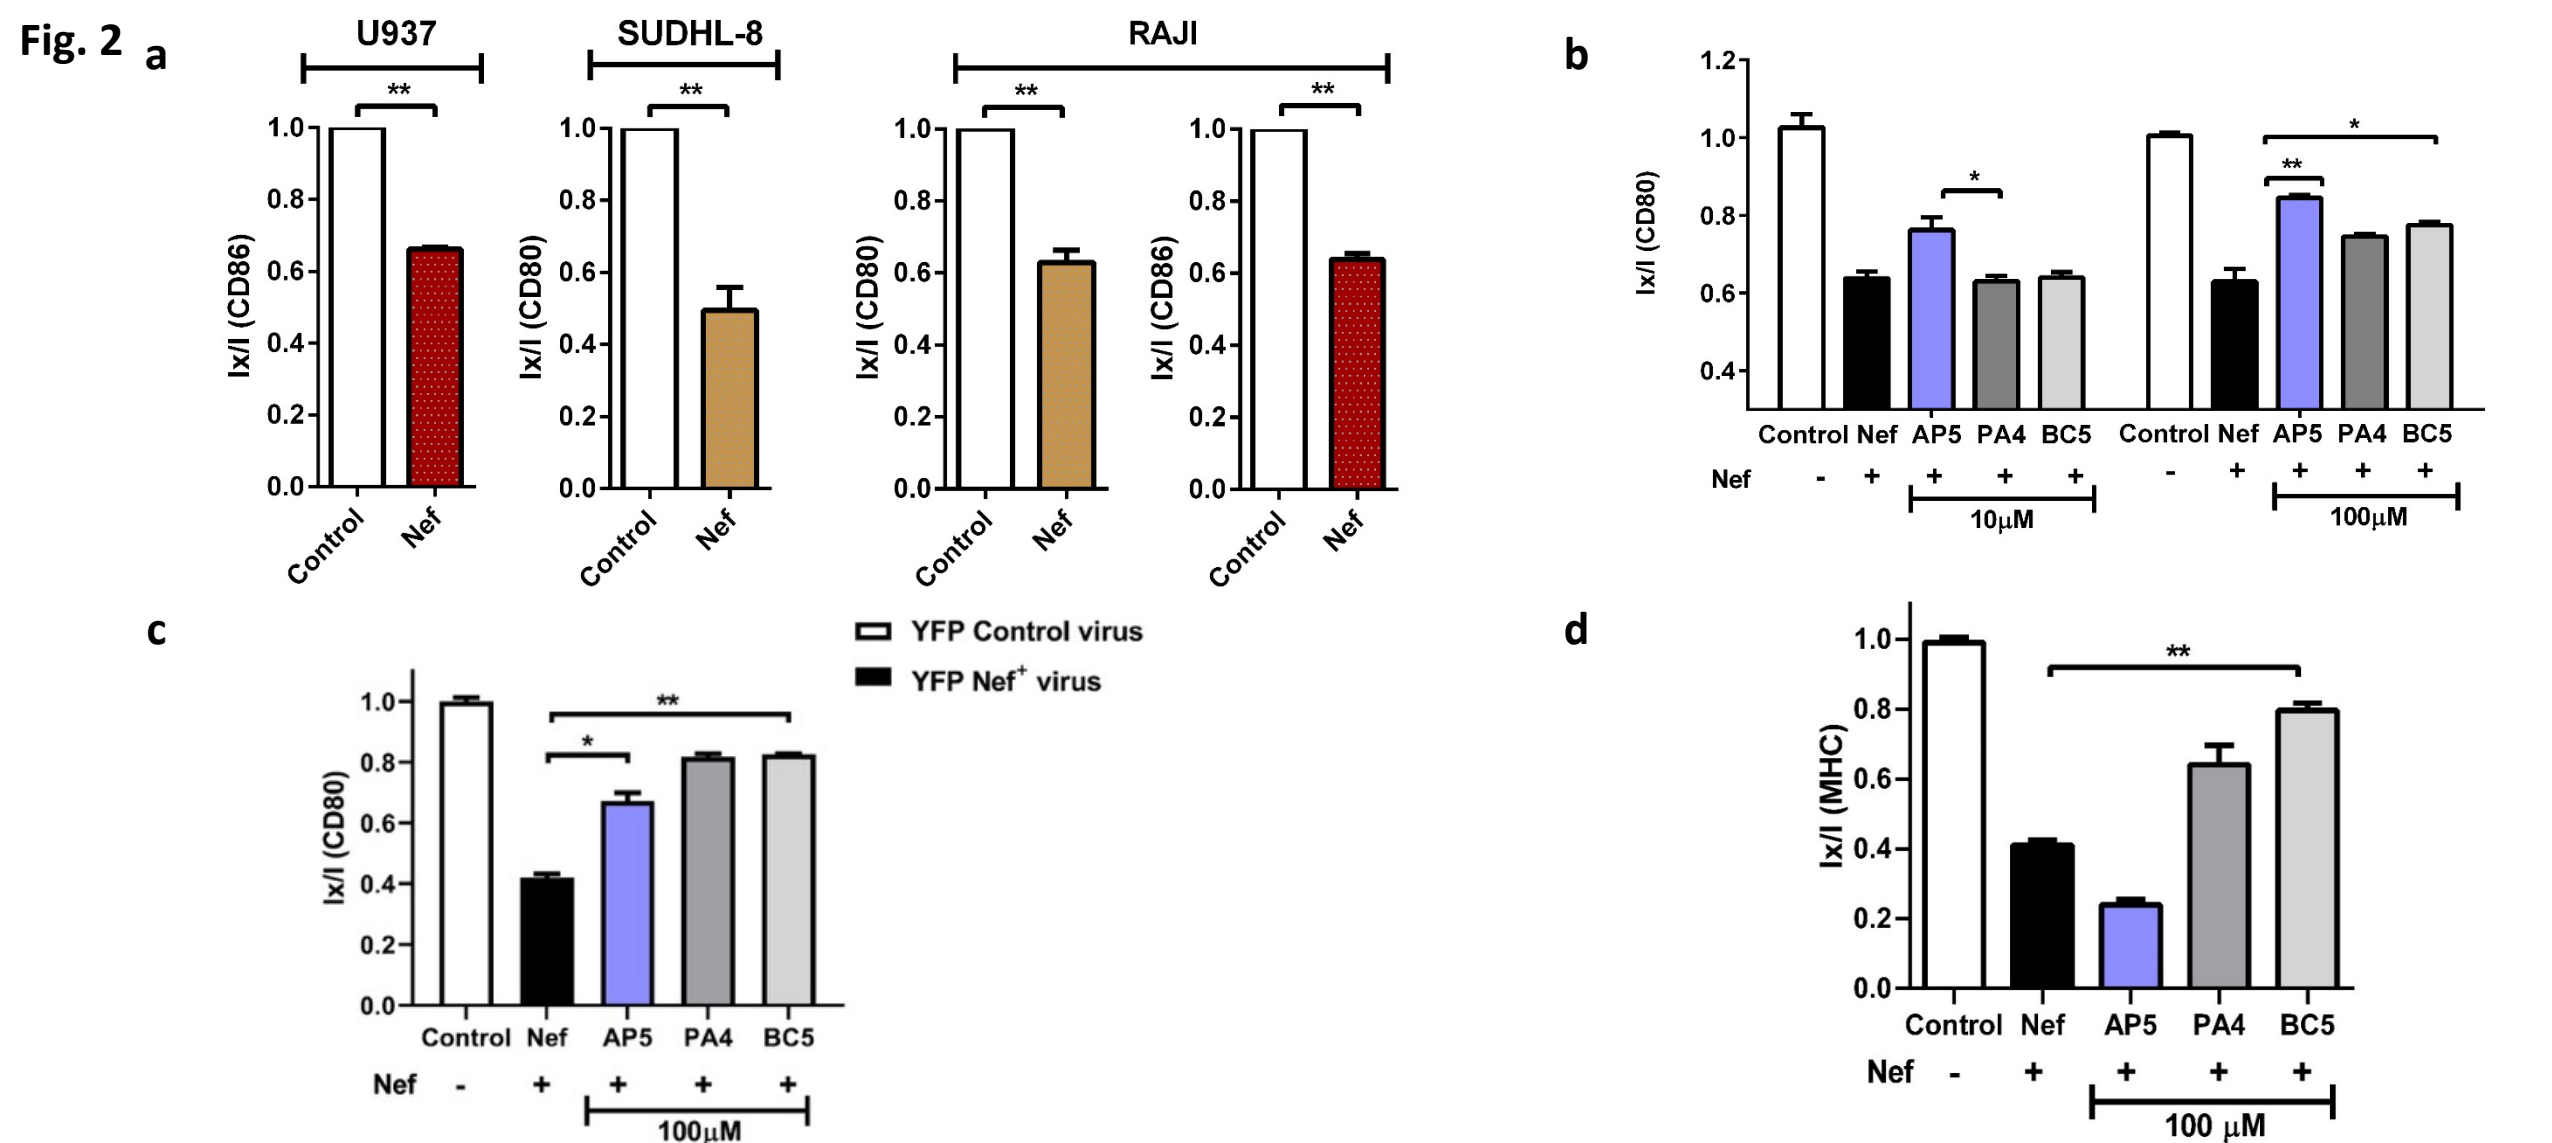

**Fig. 2: Cell based assay screening of active compounds from ELISA.** (a) Nef mediated down-regulation of surface CD80 or CD86 in 3 different cell lines as indicated. FACS data showing the normalized surface levels of CD80;  $I_x/I$  (y axis) where  $I_x$  is the average fluorescence intensity in the indicated condition (from a triplicate) and  $I$  is the Median of normalized negative control (No Nef control) (b) FACS data shows restoration of CD80 receptors in RAJI cell line after pre-treatment with 3 representative compounds **AP5**, **PA4** and **BC5** at 10 and 100  $\mu\text{M}$  for 24 h and analysis after 2 h post Nef protein delivery (c) RAJI cell line was infected with viral particles (Nef-YFP and YFP alone control cells) in viral infection assay and surface CD80 receptors with compounds were measured by flow cytometry (d) Effects of inhibitors on Nef-MHC-I interactions. RAJI cells were treated with compounds at 100  $\mu\text{M}$  and then stained with anti-MHC-I antibody. MHC-I was detected by flow cytometry and shown as  $I_x/I$  plots. Compound **AP5** shows no restoration of MHC-I indicating its specificity for the Nef-CD80 interface.

**Fig. 3**

**a**

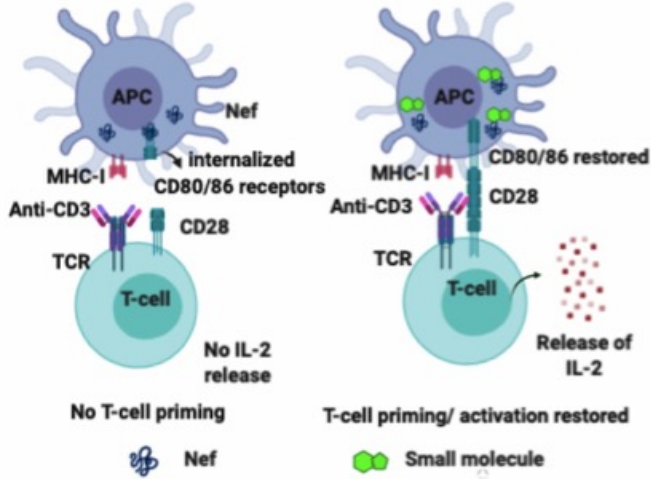

**b**

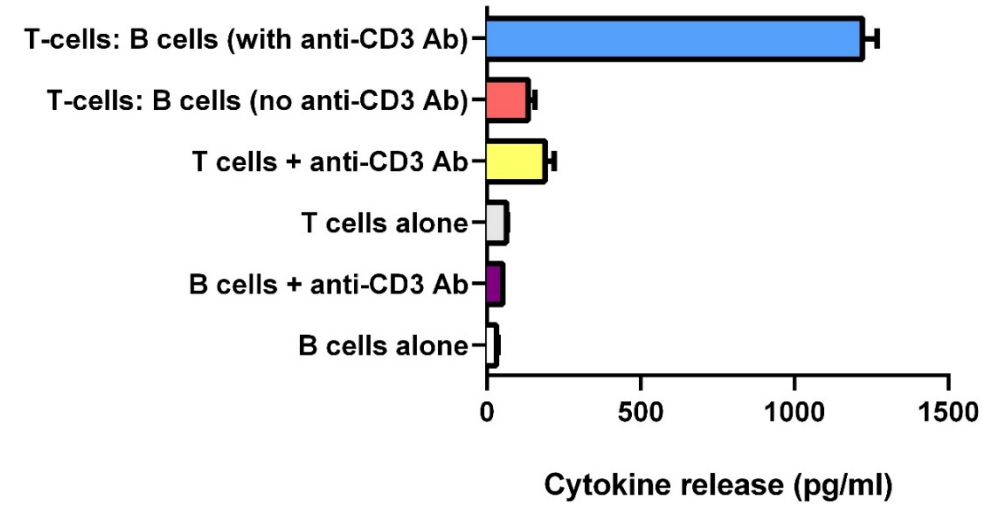

**c**

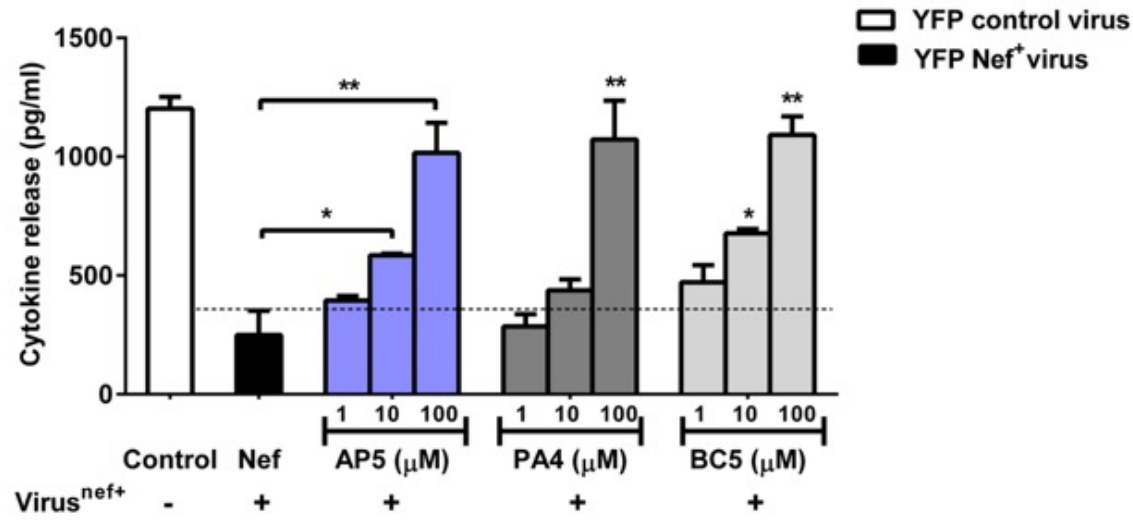

**d**

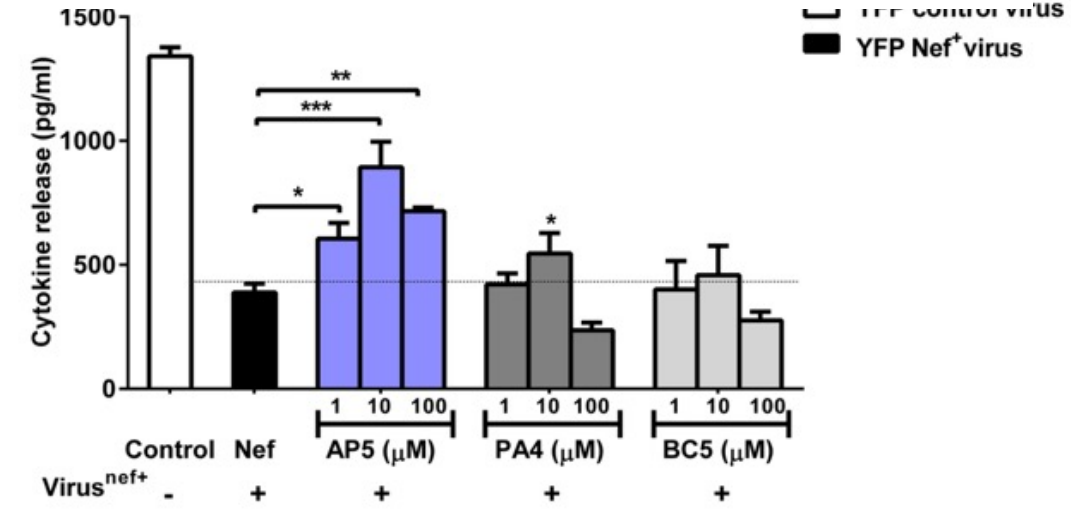

**Fig. 3: Restoration of functional T-cell activation in a viral infection assay** (a) Schematic of a functional assay for screening of compounds that disrupt Nef-CD80/86 interactions in a virally-infected cell. Functional T-Cell activation is based on APC-T cell co-cultures. The APC has CD80/86 and concurrent presence of anti-CD3 antibody promotes T-cell activation (as measured via IL-2) in co-cultured T-cells (b) Graph shows cytokine release in functional T-cell activation assay where antigen presenting cell RAJI (B-cells) and Jurkat-cells (T cells) were co-cultured as indicated (with/without anti-CD3 antibody); T-cells alone, B-cells alone controls do not show measurable IL-2 release. (c) Graph shows quantification of cytokine (IL-2) released after T-cells and B-cells co-culture for 3 h; here B-cells were pretreated with the indicated concentrations (1, 10, 100 μM) of compounds for 24 h followed by viral infection for 96 h (d) Graph shows quantification of cytokine (IL-2) released after T-cells and B-cells co-culture for 3 h; here B-cells were first infected with virus for 96h and then treated with compounds at 1, 10, 100 μM for 24 h. IL-2 release (pg/ml) was determined by ELISA by plotting against an IL-2 standard curve. Note: viral infection reduces IL-2 release, and all 3 compounds showed a dose dependent restoration of IL-2 release. **AP5** showed IL-2 release at 1 μM.



**Fig. 4**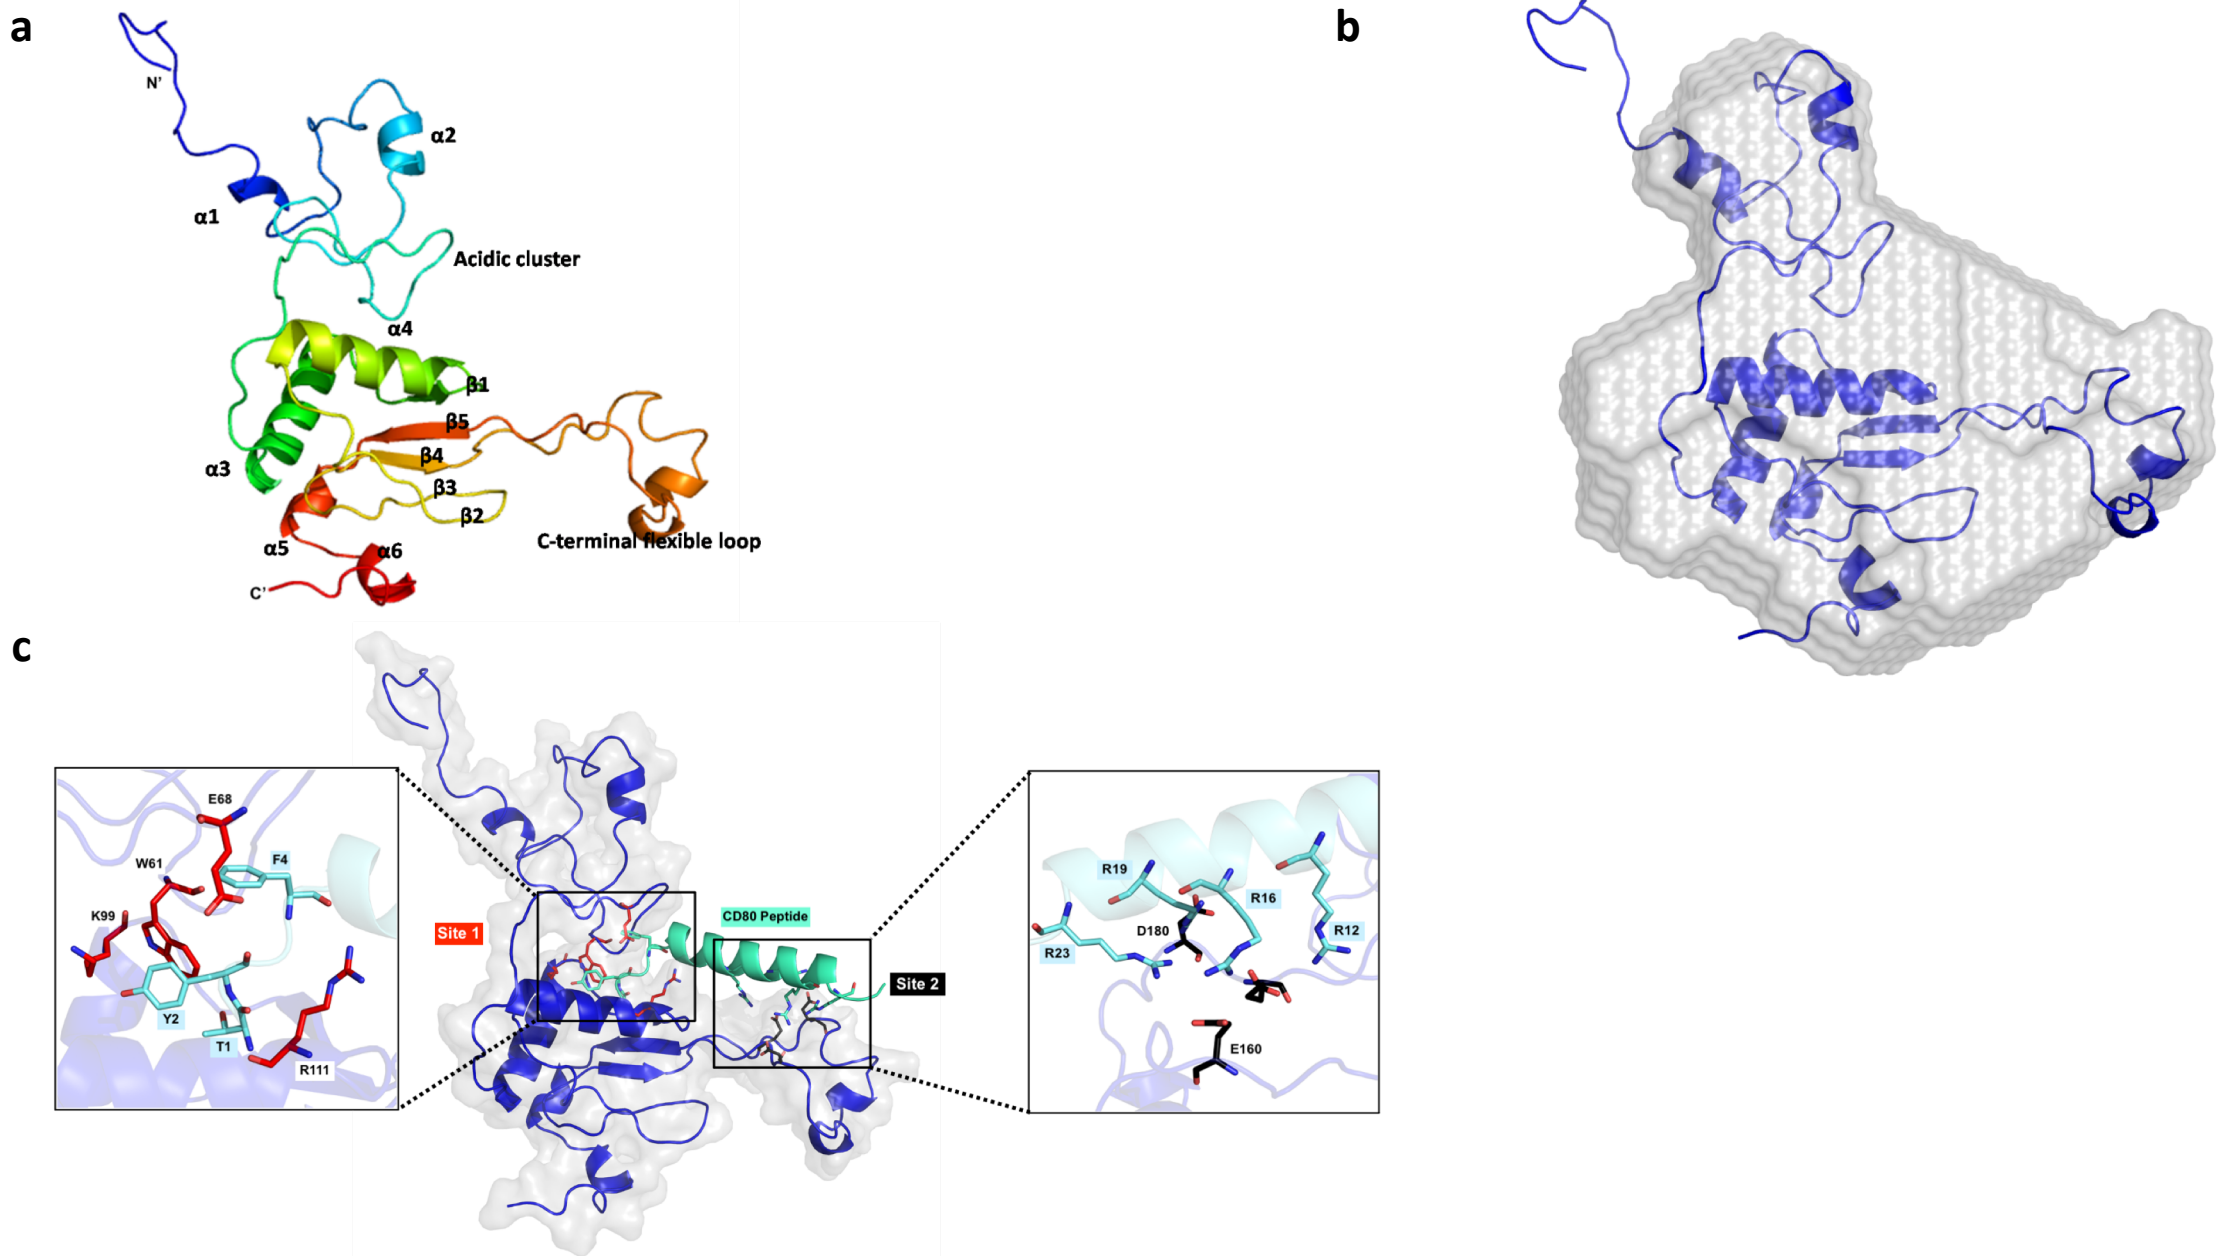

**Fig. 4: Modelling of Nef with multi-template computational approach** (a) Cartoon representation of the predicted structure of Nef shows flexible N-terminal region and well-conserved core domain, colored in accordance with their position (N-terminal in blue to C-terminal in red) with respective  $\alpha$ -helices and  $\beta$ -sheets as indicated. (b) The *ab initio* shape of the solution structure of the Nef (blue color) from the SAXS data (grey surface) fits well with the computational model (cartoon representation) (c) Surface representation of HIV-1 Nef is depicted with the best CD80 binding pose. CD80 peptide in a docked pose (cyan color) in Nef obtained using SiteMap program. The inset shows the important residues of Nef involved in interaction with CD80 at Sites 1 and 2.

**Fig. 5**

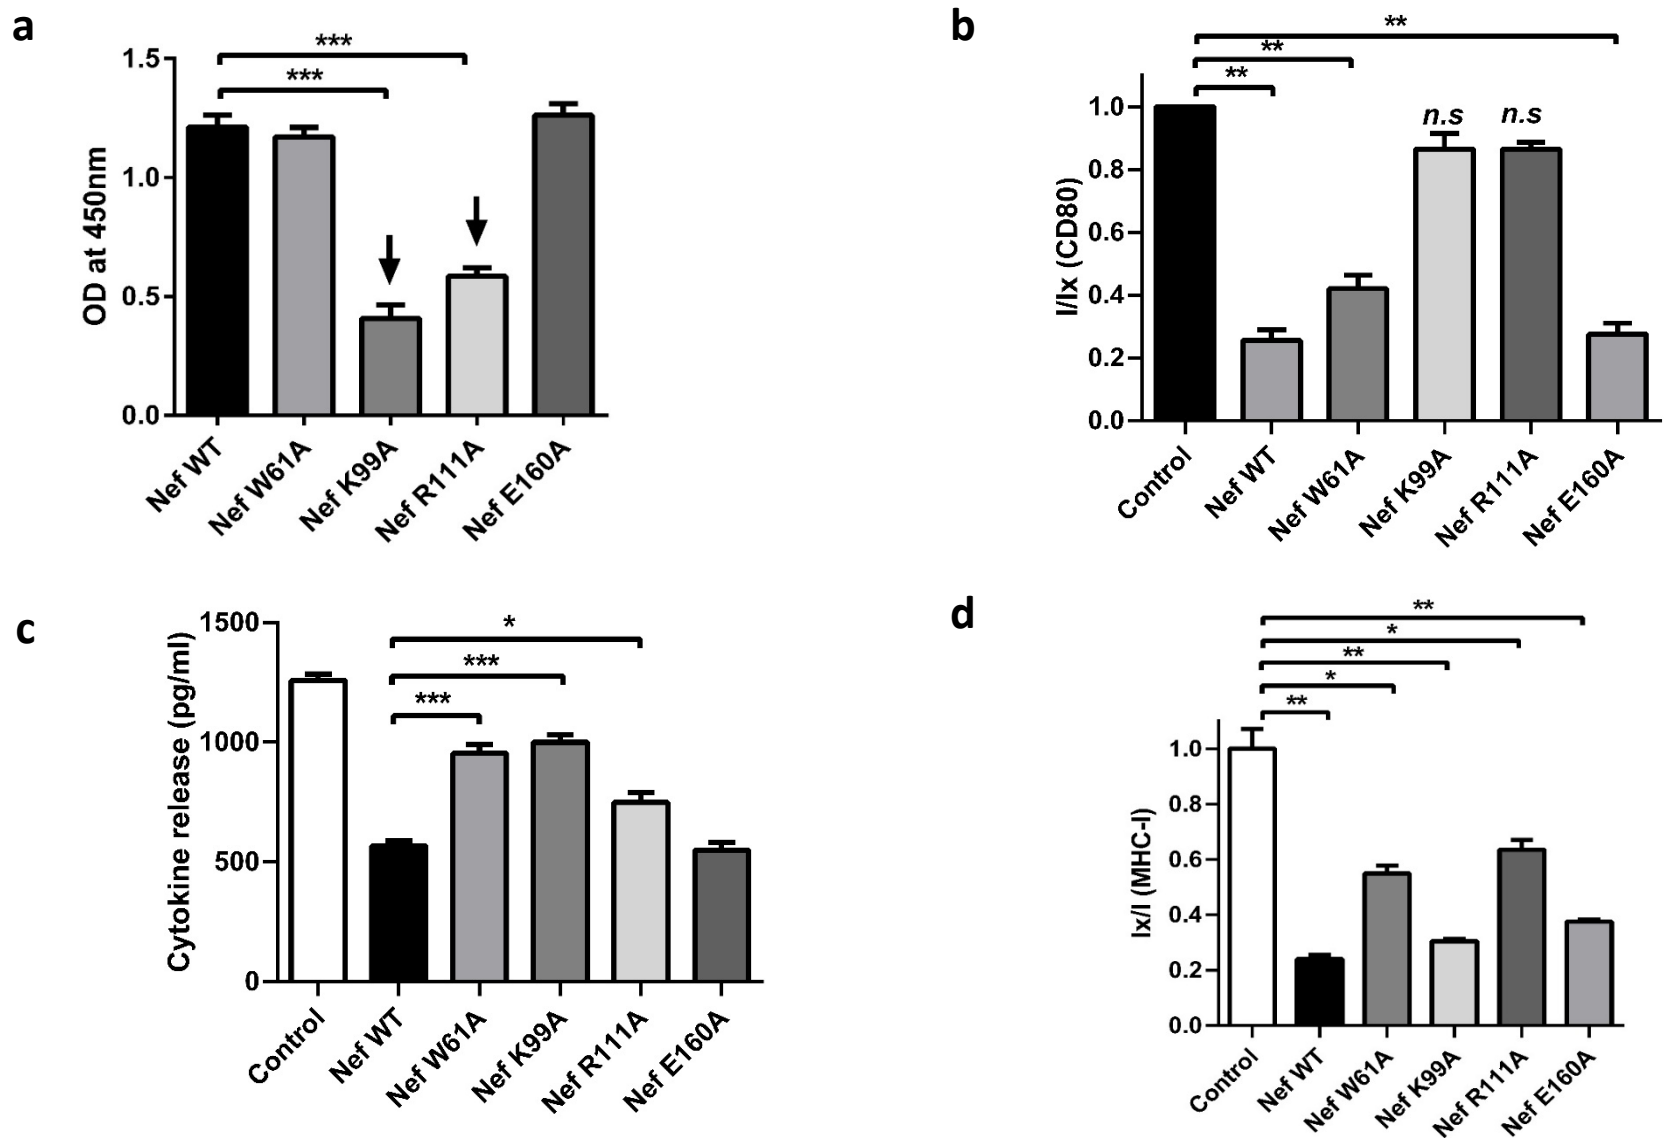

**Fig. 5: Evaluation of interaction between CD80 and Nef mutants in biochemical and cell-based assays** (a) Graph shows colorimetric signal of immobilized CD80 cytosolic peptide upon binding to Nef<sup>fWT</sup> or Nef mutants as measured by ELISA at OD450nm. Two mutants Nef<sup>fK99A</sup> and Nef<sup>fR111A</sup> showed reduced affinity to CD80 peptide (b) Graph shows FACS data of surface levels of CD80 receptors in RAJI cell line after delivery of Nef<sup>fWT</sup> or Nef mutant protein delivery. No significant down regulation seen with mutants Nef<sup>fK99A</sup> and Nef<sup>fR111A</sup> (c) Graph shows the levels cytokine (IL-2) released in supernatants of cells in the co-culture functional T-cell activation assay after delivery of the Nef mutants as compared to the wild type Nef protein. (d) Graph shows FACS data of MHC-1 levels after delivery with Nef<sup>fWT</sup> and mutants. Nef<sup>fWT</sup> or mutants were delivered into RAJI cells using Chariot<sup>TM</sup> delivery reagent. MHC-I was detected by flow cytometry and shown as Ix/I plots.

**Fig. 6**

**a**

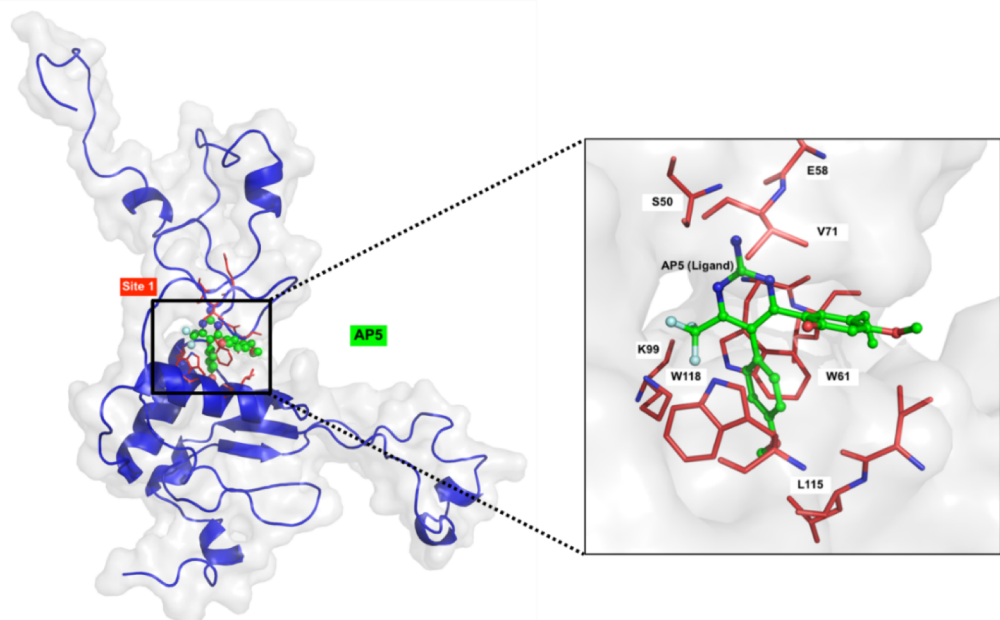

**b**

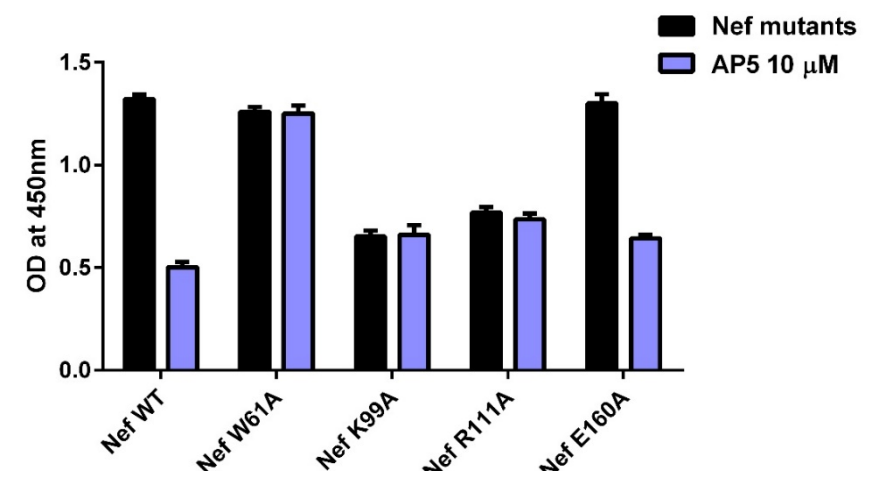

**c**

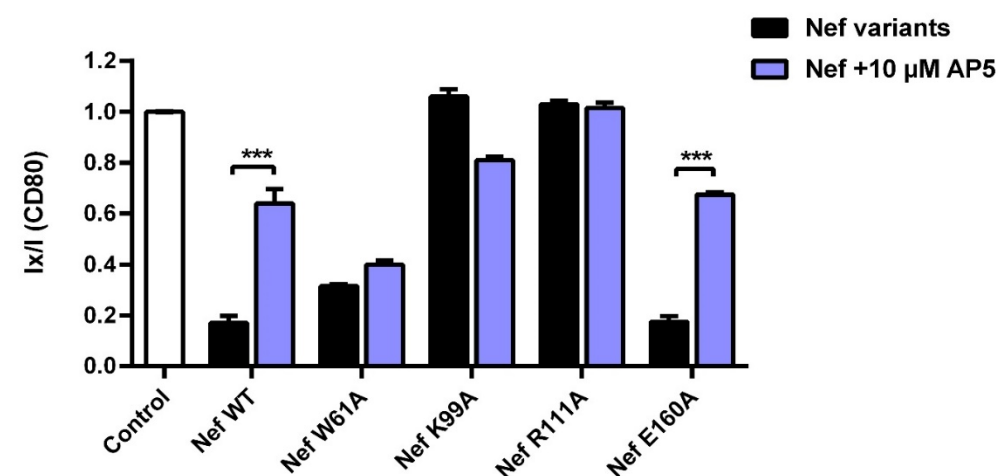

**d**

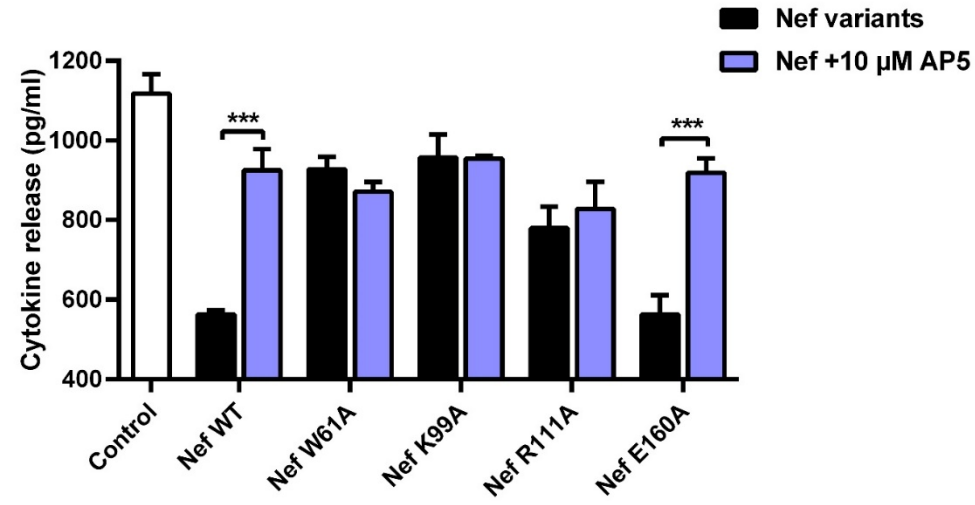

**Fig. 6: Structural and functional evaluation of the interaction between Nef and AP5** (a) Surface representation of HIV-1 Nef depicting **AP5** ligand (green color) binding. The binding site of **AP5** molecule overlaps with the CD80 binding site (Site-1). The inset shows the important residues for the interaction between AP5 and Nef. The non-polar residues such as W<sub>61</sub>, L<sub>91</sub>, I<sub>109</sub> and L<sub>115</sub> contribute to hydrophobic interactions with CF<sub>3</sub>. **AP5** ligand docking studies shows that the binding interactions occurs between the α<sub>4</sub> and α<sub>5</sub> helices along with few residues such as W<sub>61</sub>, E<sub>65</sub> and R<sub>111</sub> which are crucial for **AP5**-Nef interaction (b) Graph shows colorimetric signal of immobilized CD80 cytosolic peptide upon binding to Nef<sup>WT</sup> or Nef mutants in the presence /absence of 10 μM AP5 as measured by ELISA at OD450 nm. (c) Graph shows surface levels of CD80 receptors in RAJI cell line after the delivery of Nef<sup>WT</sup> or Nef mutant protein delivery as measured by FACS in the presence /absence of 10 μM AP5. Nef<sup>W61A</sup>, Nef<sup>K99A</sup> and Nef<sup>R111A</sup> did not show any further change in CD80 levels with **AP5** addition. (d) Graph shows cytokine (IL-2) release in supernatants after the co-culture T-cell activation assay. RAJI cells were pre-treated with 10 μM AP5 for 1 h and then the cells were delivered with Nef mutants or wild type Nef protein for 2 h before co-culture with Jurkat T-cells for 3 h. The IL-2 levels remain unchanged with and without addition of **AP5** compound in all three mutants Nef<sup>W61A</sup>, Nef<sup>K99A</sup> and Nef<sup>R111A</sup>. Reduction in IL-2 seen with mutant Nef<sup>E160A</sup> comparable to Nef<sup>WT</sup>.

**Fig. 7**

**a**

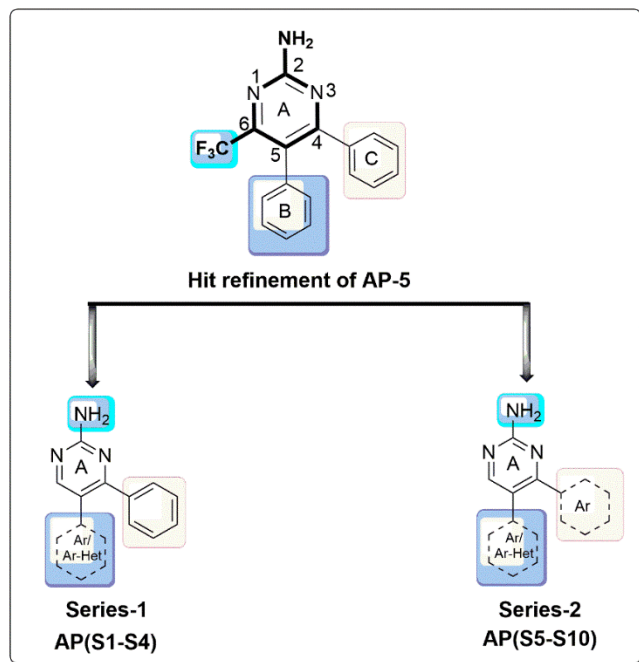

**c**

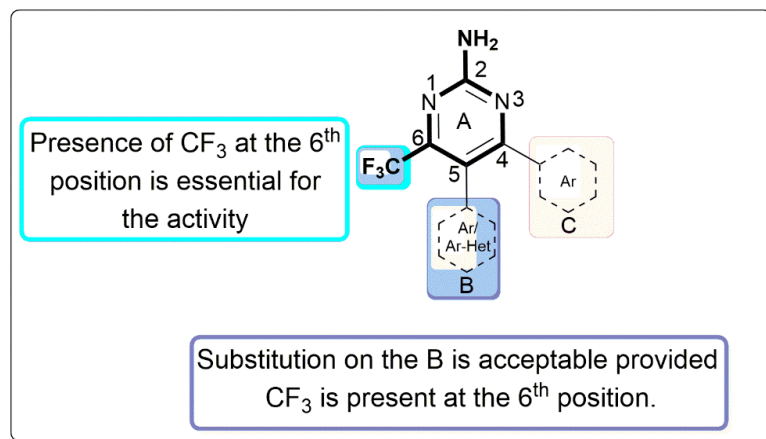

**b**

| Sample Codes | SAR Strategy    |                  |                 | Primary Screening |          | Secondary screening |
|--------------|-----------------|------------------|-----------------|-------------------|----------|---------------------|
|              | CF <sub>3</sub> | Ring B           | Ring C          | CD80 NPI          | CD86 NPI | Cell based assay    |
| AP-S1        | -               | CF <sub>3</sub>  | Phenyl          | Active            | Inactive | Inactive            |
| AP-S2        | -               | Cl               | Phenyl          | Active            | Inactive | Inactive            |
| AP-S3        | -               | F                | Phenyl          | Active            | Inactive | Inactive            |
| AP-S4        | -               | CN               | Phenyl          | Inactive          | Active   | Inactive            |
| AP-S5        | -               | O                | CF <sub>3</sub> | Active            | Inactive | Inactive            |
| AP-S6        | -               | Cl               | CF <sub>3</sub> | Active            | Active   | Inactive            |
| AP-S7        | -               | S                | F               | Inactive          | Active   | Inactive            |
| AP-S8        | -               | OCF <sub>3</sub> | O               | Active            | Active   | Inactive            |
| AP-S9        | -               | Phenyl           | F               | Active            | Active   | Inactive            |
| AP-S10       | -               | CF <sub>3</sub>  | F               | Active            | Inactive | Inactive            |
| AP-S11       | CF <sub>3</sub> | Cl               | HO, O           | Active            | Inactive | Active              |

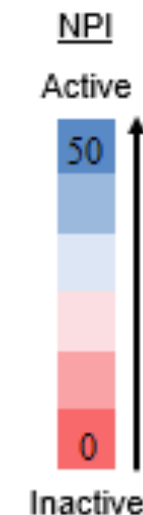

**Fig. 7: SAR and Hit refinement with AP5 as a template** (a) Scheme shows Medicinal chemistry approach for hit refinement of **AP5** showing two series of compounds (b) Summary of SAR strategy to design compounds similar to **AP5 structure** with modifications made on rings A, B and C as indicated. The synthesized molecules were evaluated for their effect on Nef-CD80/CD86 inhibition (c) Heat map table showing SAR with synthesized compounds. The various substitutions in rings A, B and C are indicated as well as their activity in the ELISA and cell-based assays
